# Supplementary material
Source: publisher figshare collection journal article supplement (https://acs.figshare.com/ndownloader/files/8754004)

## *Supporting Information*

### **Synthesis of Benzo[4,5]imidazo[1,2-*c*]pyrimidin-1-amines and Their Analogs via Copper-Catalyzed C-N Coupling and Cyclization**

Pham Duy Quang Dao,<sup>a</sup> Ha Kyeong Lee,<sup>a</sup> Ho-Sang Sohn,<sup>b</sup> Nam Sik Yoon,<sup>c</sup> and Chan Sik Cho<sup>\*,a</sup>

<sup>a</sup>Department of Applied Chemistry, Kyungpook National University, 80 Daehakro, Bukgu, Daegu 702-701, Republic of Korea

<sup>b</sup>Department of Materials Science and Metallurgical Engineering, Kyungpook National University, 80 Daehakro, Bukgu, Daegu 702-701, Republic of Korea

<sup>c</sup>Department of Textile System Engineering, Kyungpook National University, 80 Daehakro, Bukgu, Daegu 702-701, Republic of Korea

\* Corresponding author. Tel.: +82 53 950 5586; fax: +82 53 950 6594

E-mail address: cscho@knu.ac.kr (C.S. Cho)

Copies of <sup>1</sup>H and <sup>13</sup>C NMR spectra of compounds **3a-3k**, **3m-3o**, **5a-5d**: S2-S20

HRMS data of compounds **3a-3k**, **3m-3o**, **5a-5d**: S21-S30

Experimental procedure for mechanism study and spectroscopic data of **9**: S31

Multiplet in the range ~2.49–2.51 is attributed to residual solvent H in DMSO- $d_6$ .

**Figure S1.**  $^1\text{H}$  and  $^{13}\text{C}$  NMR spectra of **3a**

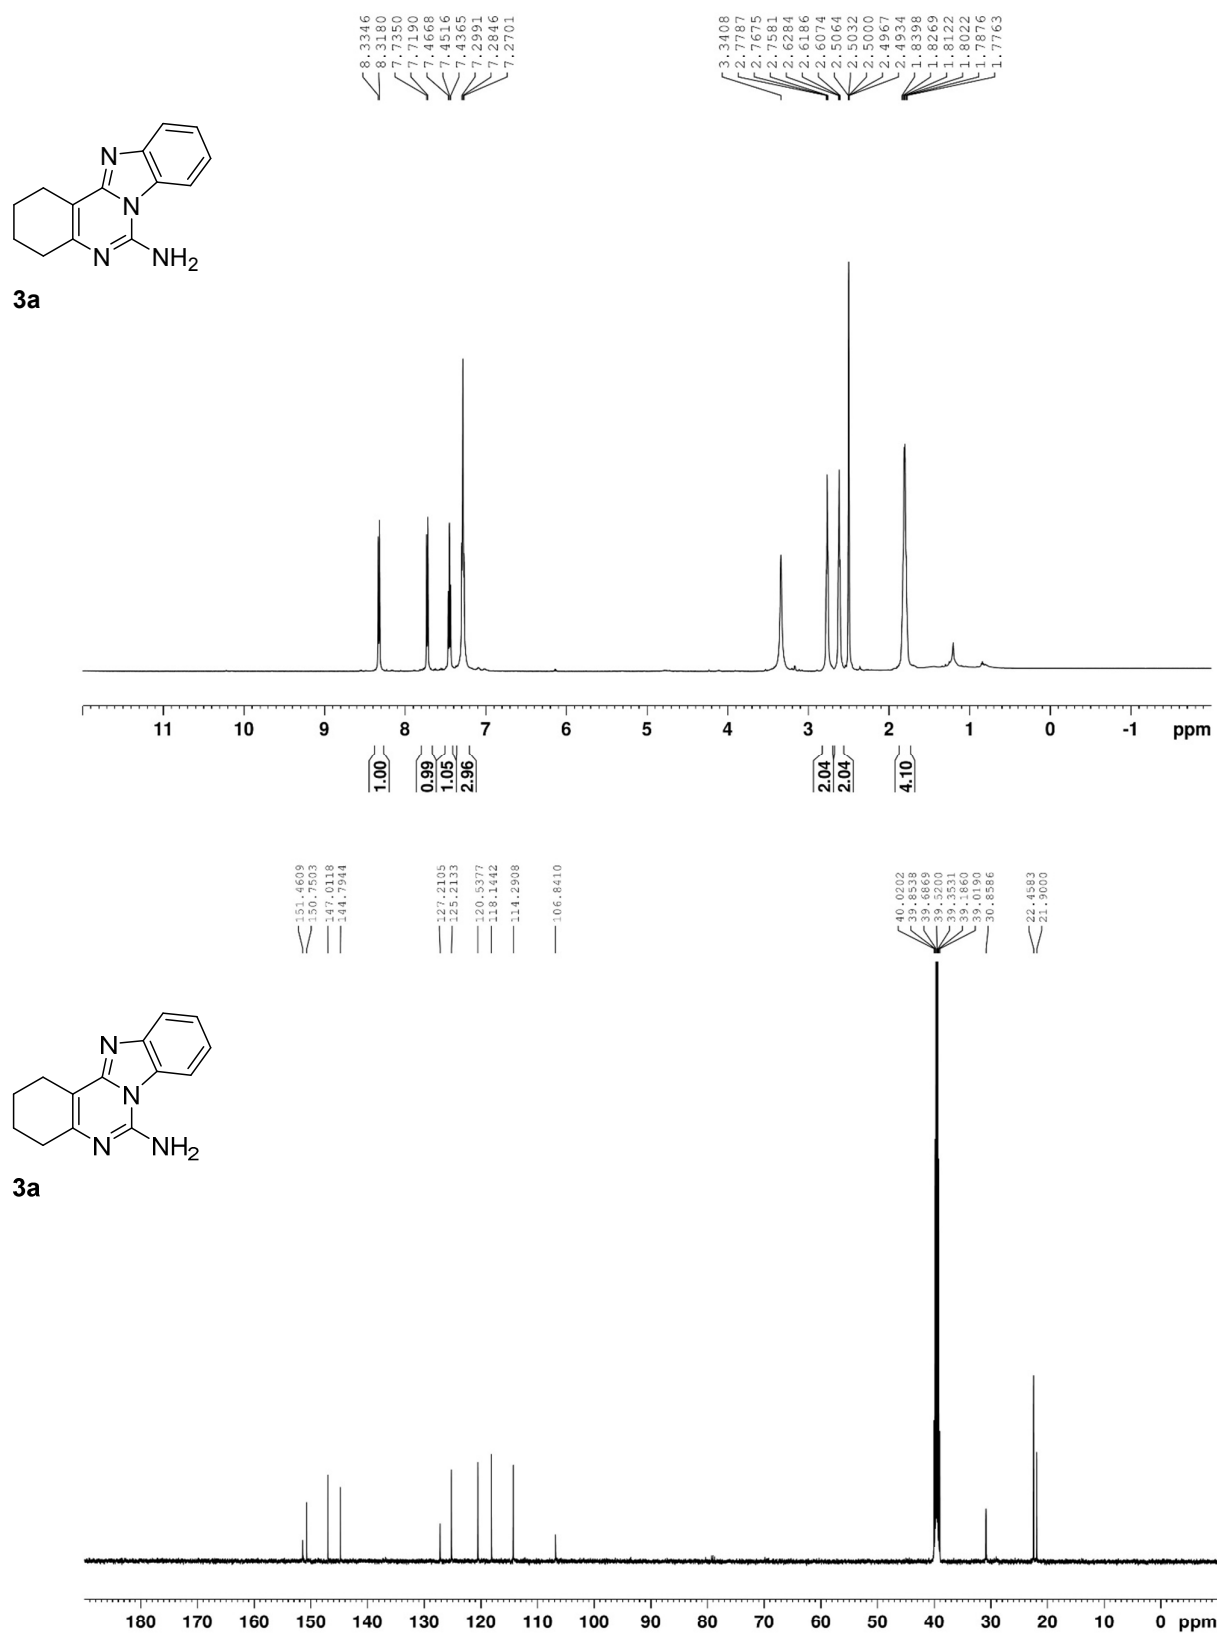

**Figure S2.**  $^1\text{H}$  and  $^{13}\text{C}$  NMR spectra of **3b**

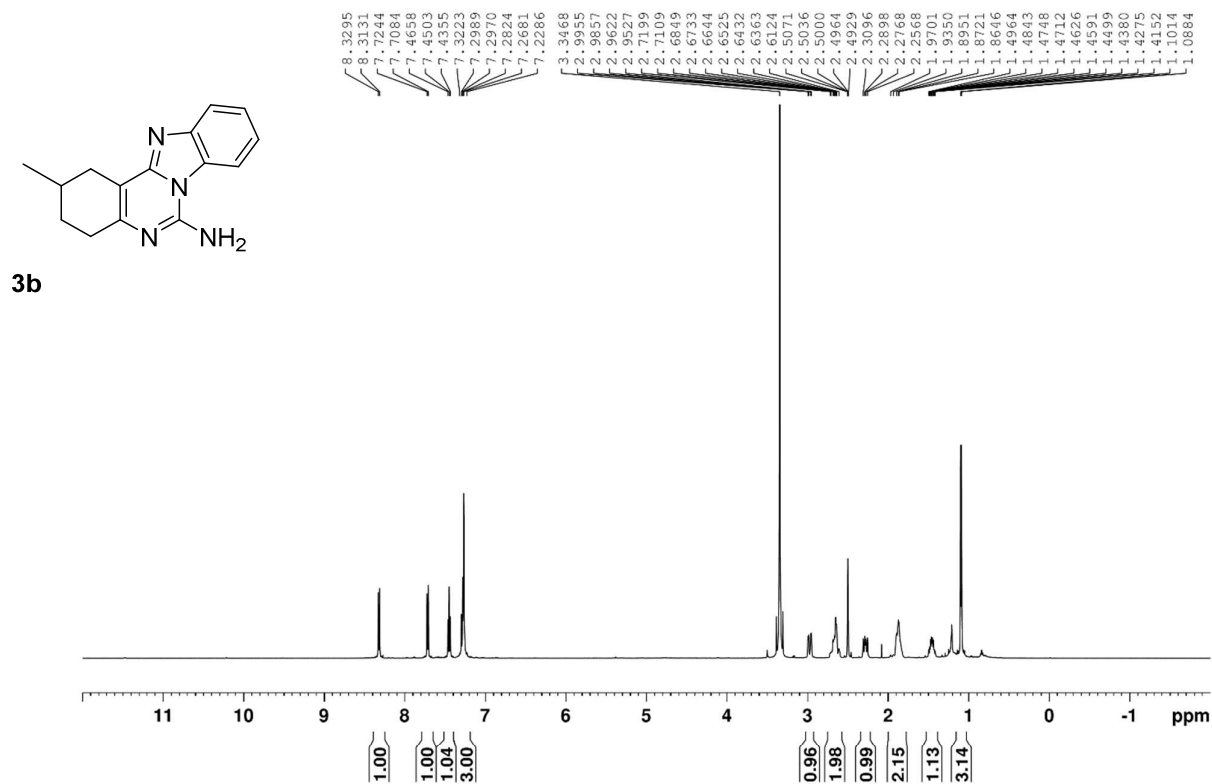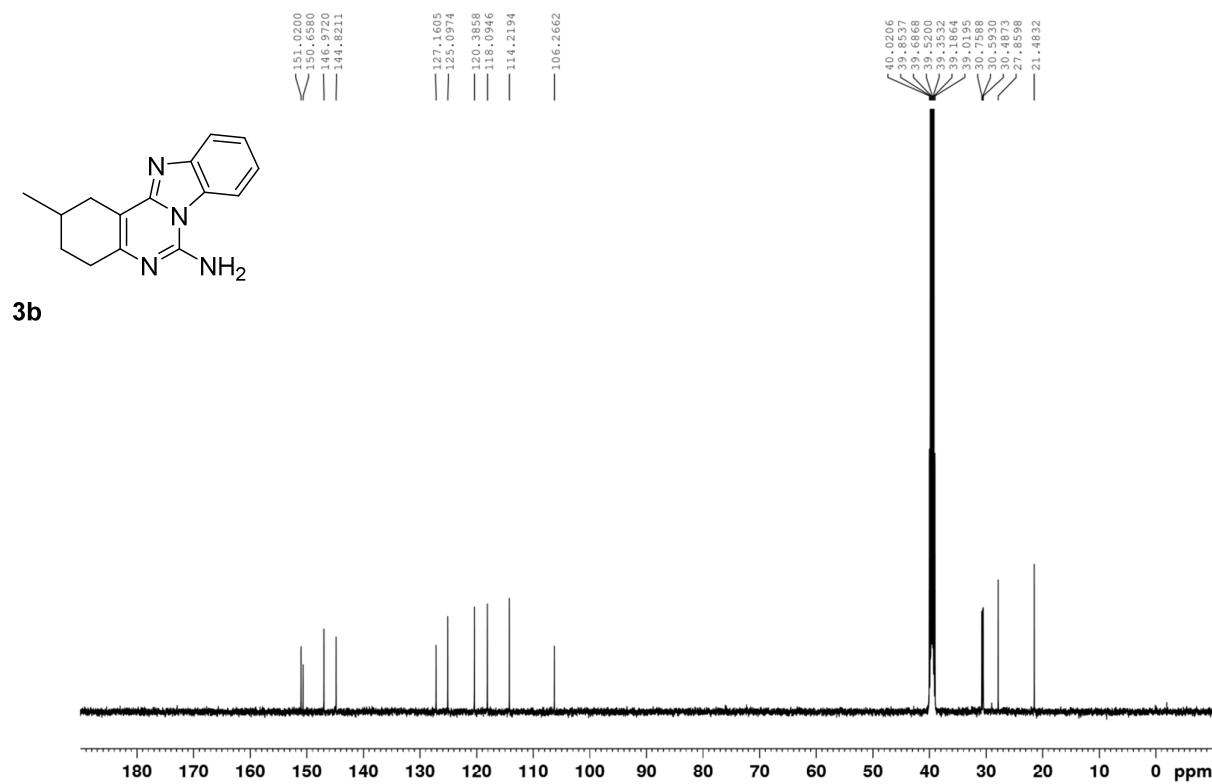

**Figure S3.**  $^1\text{H}$  and  $^{13}\text{C}$  NMR spectra of **3c**

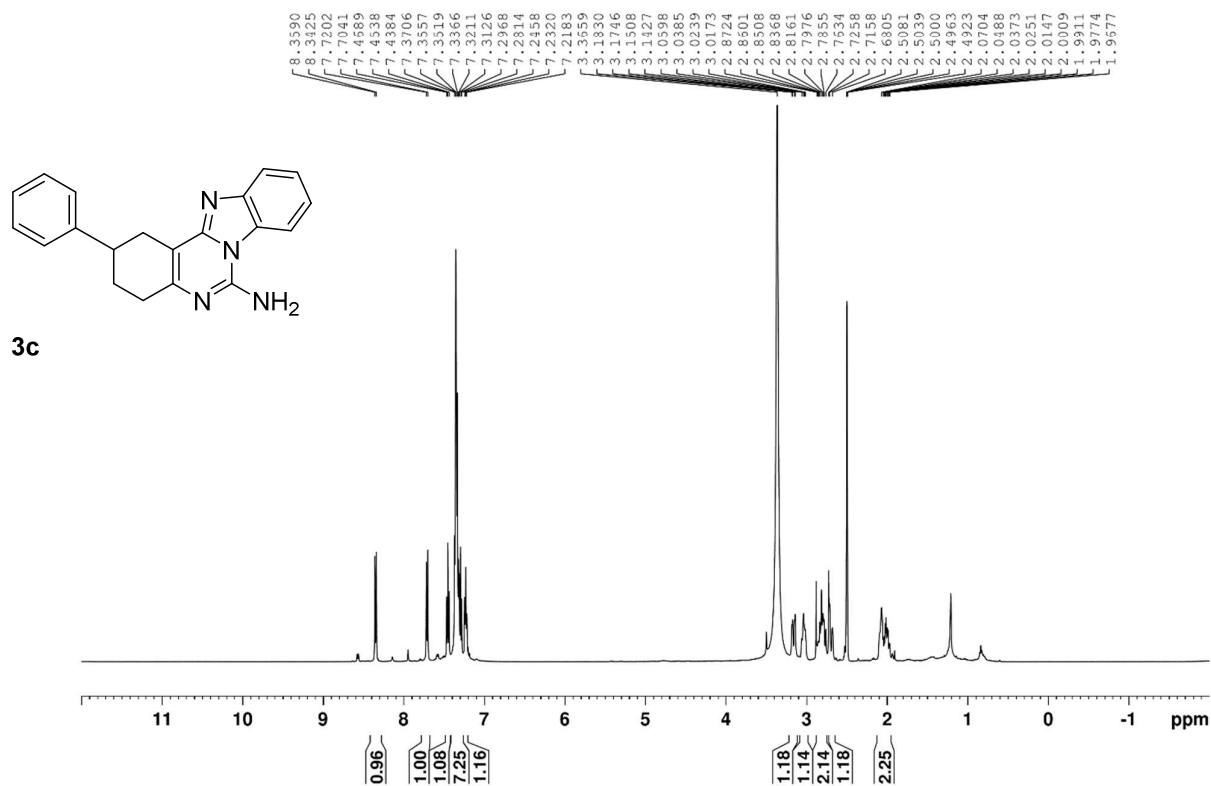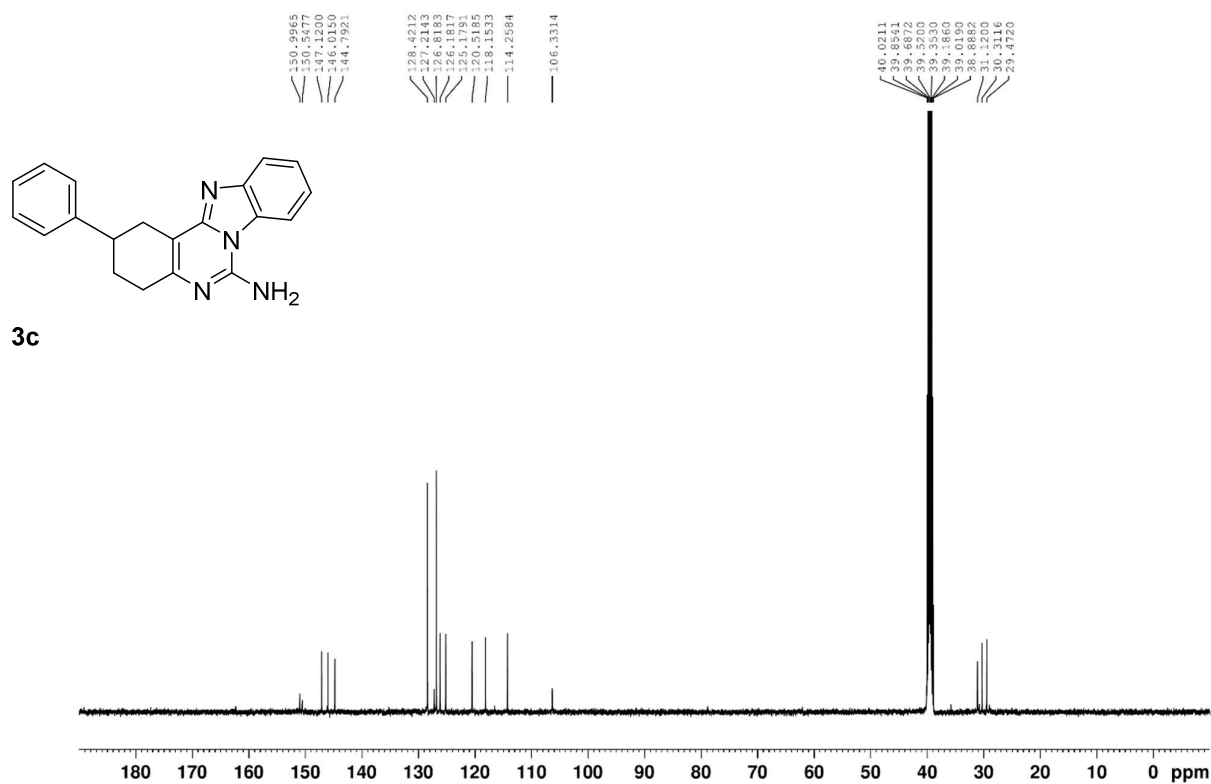



**Figure S4.**  $^1\text{H}$  and  $^{13}\text{C}$  NMR spectra of **3d**

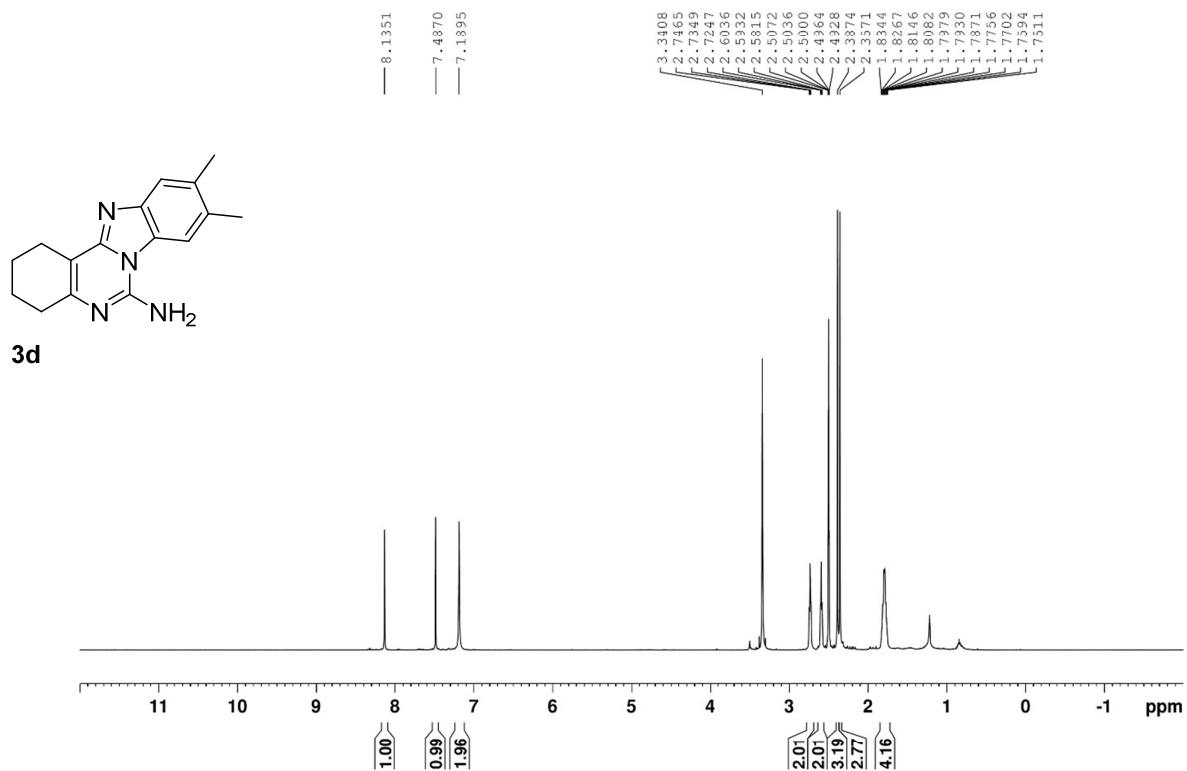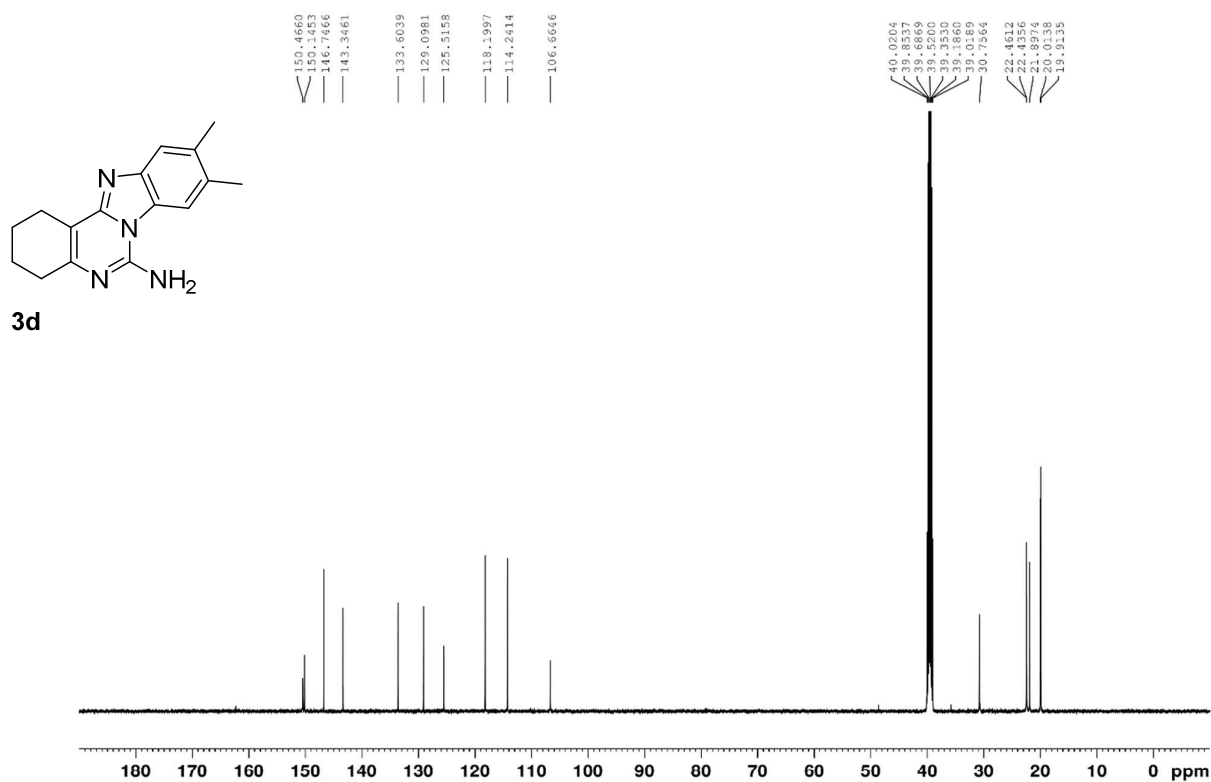

**Figure S5.**  $^1\text{H}$  and  $^{13}\text{C}$  NMR spectra of **3e**

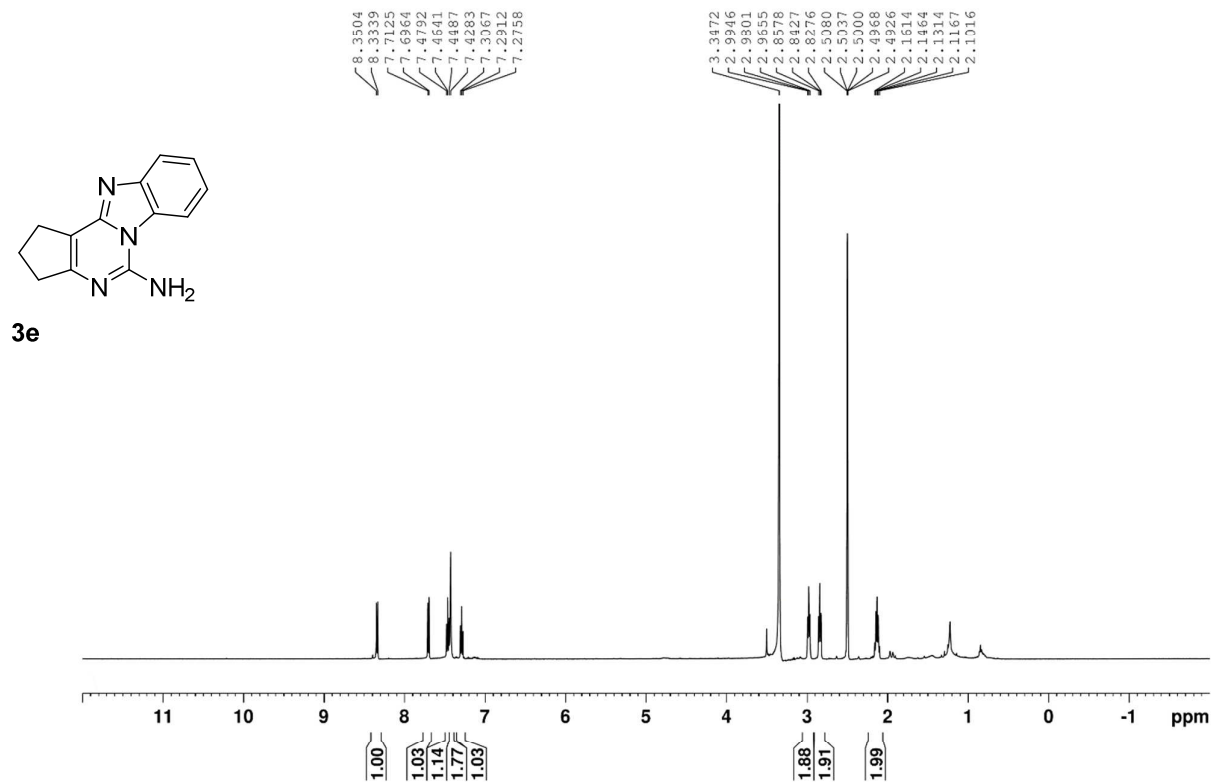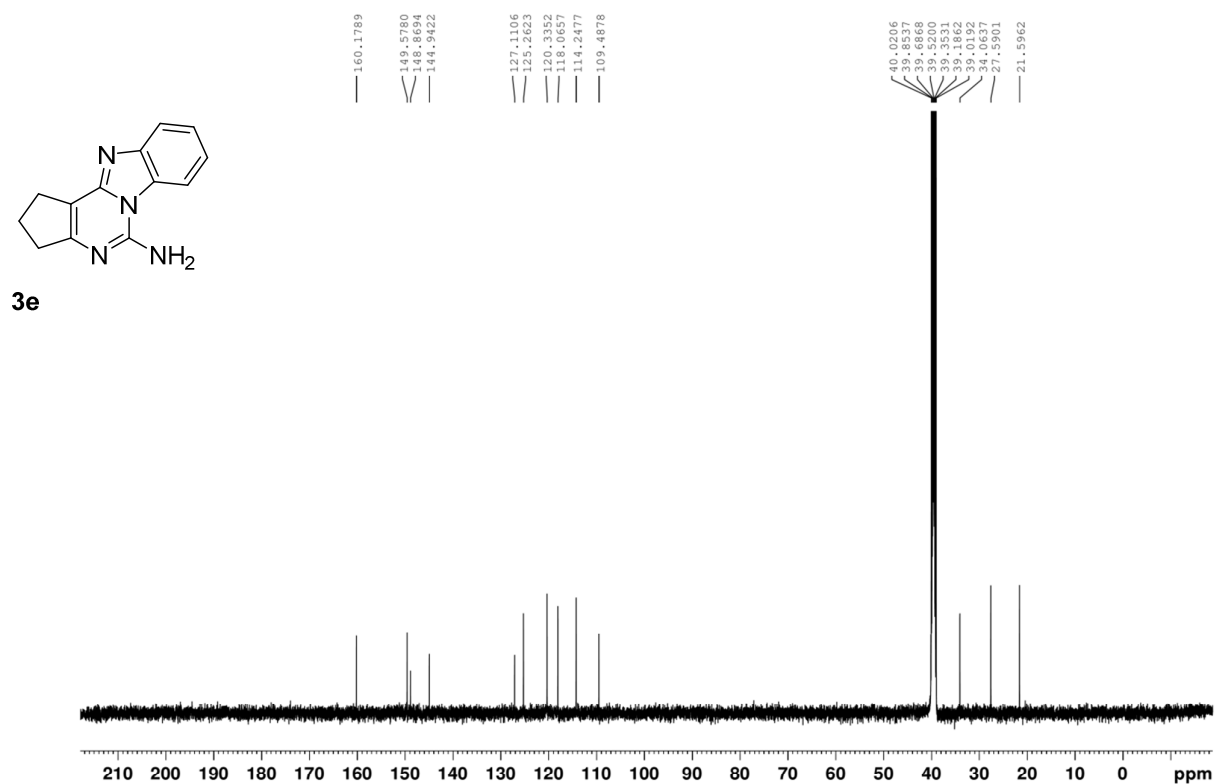

**Figure S6.**  $^1\text{H}$  and  $^{13}\text{C}$  NMR spectra of **3f**

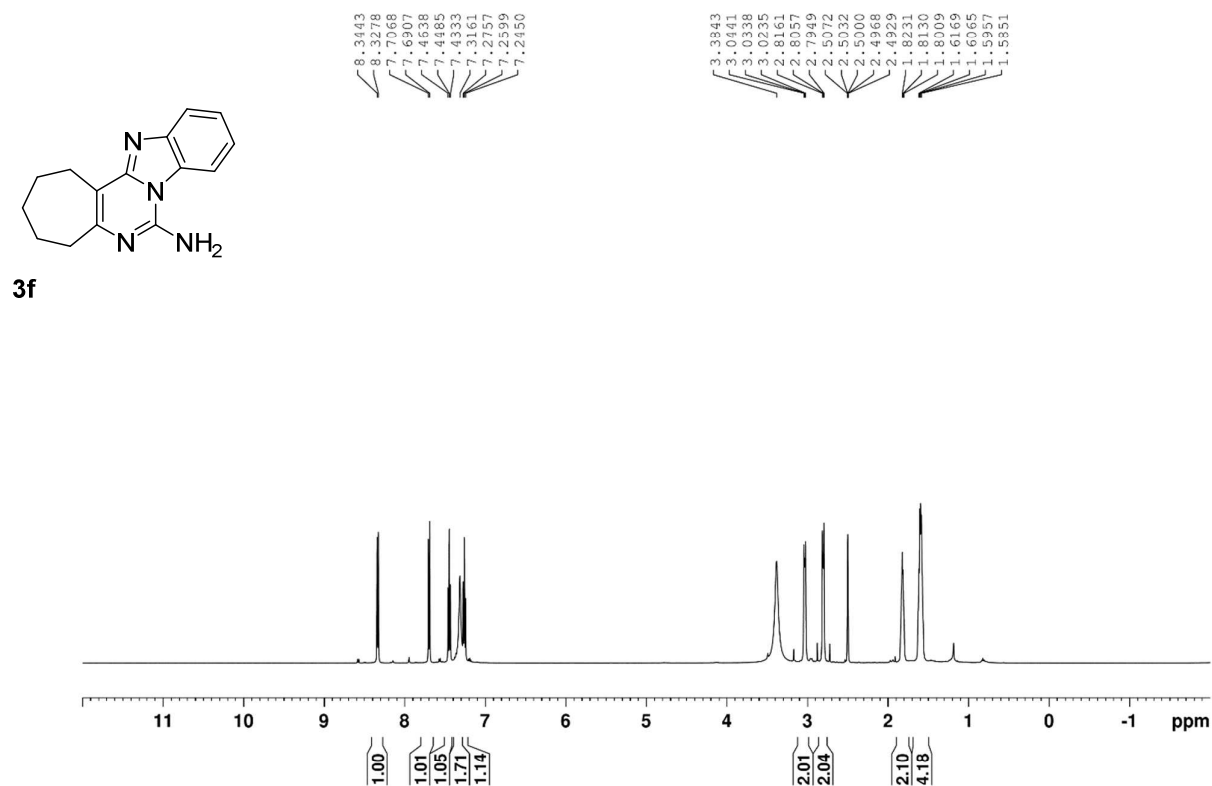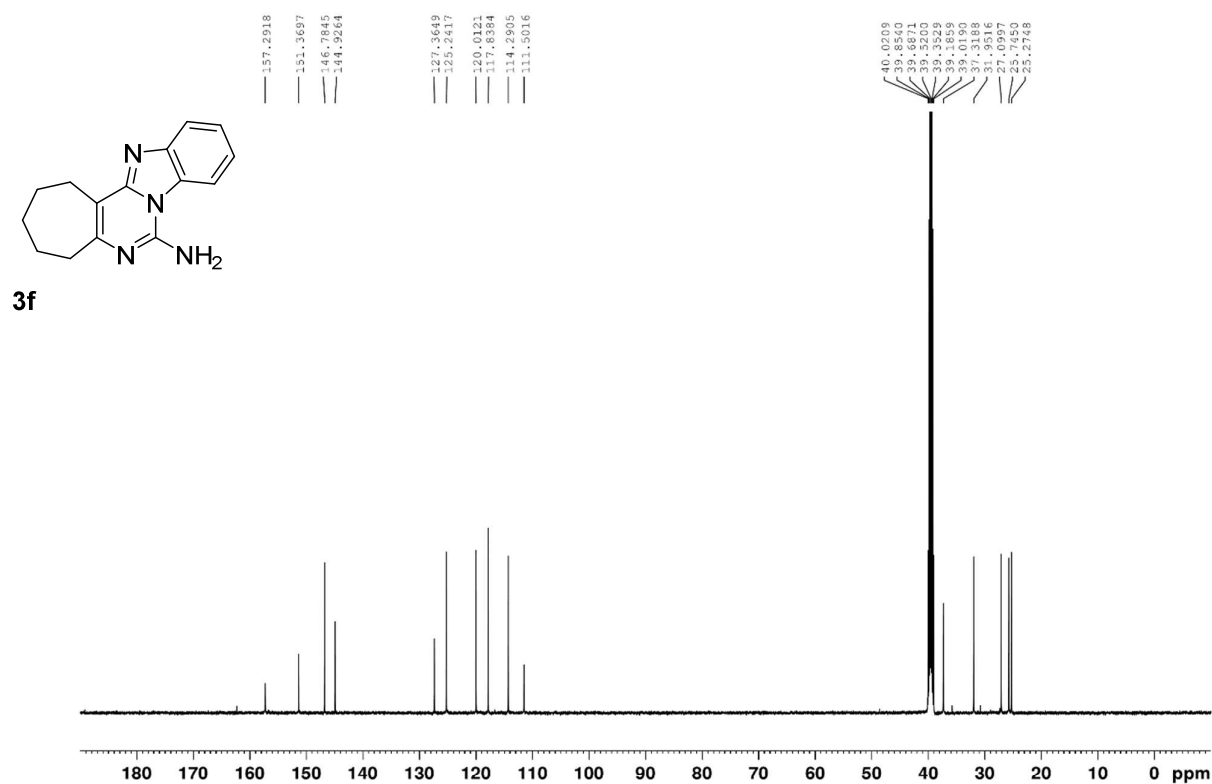

**Figure S7.**  $^1\text{H}$  and  $^{13}\text{C}$  NMR spectra of **3g**

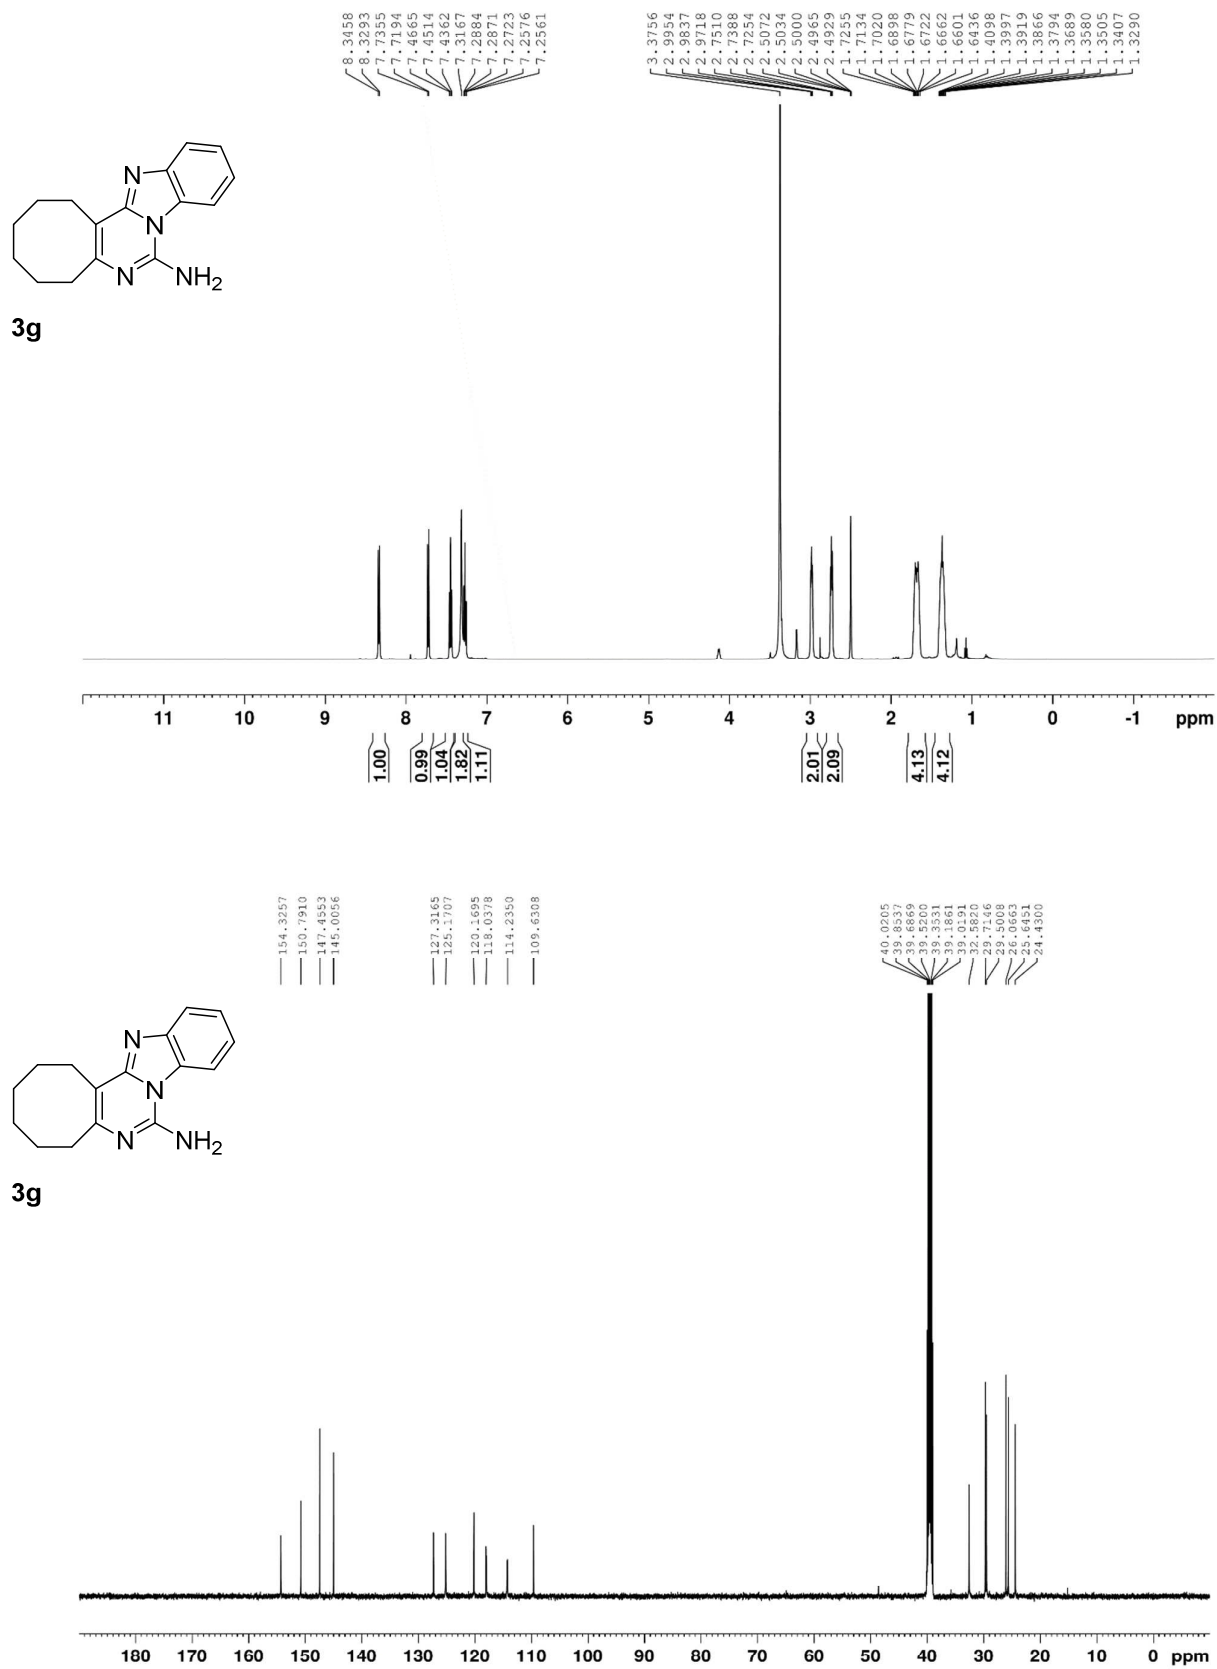

**Figure S8.**  $^1\text{H}$  and  $^{13}\text{C}$  NMR spectra of **3h**

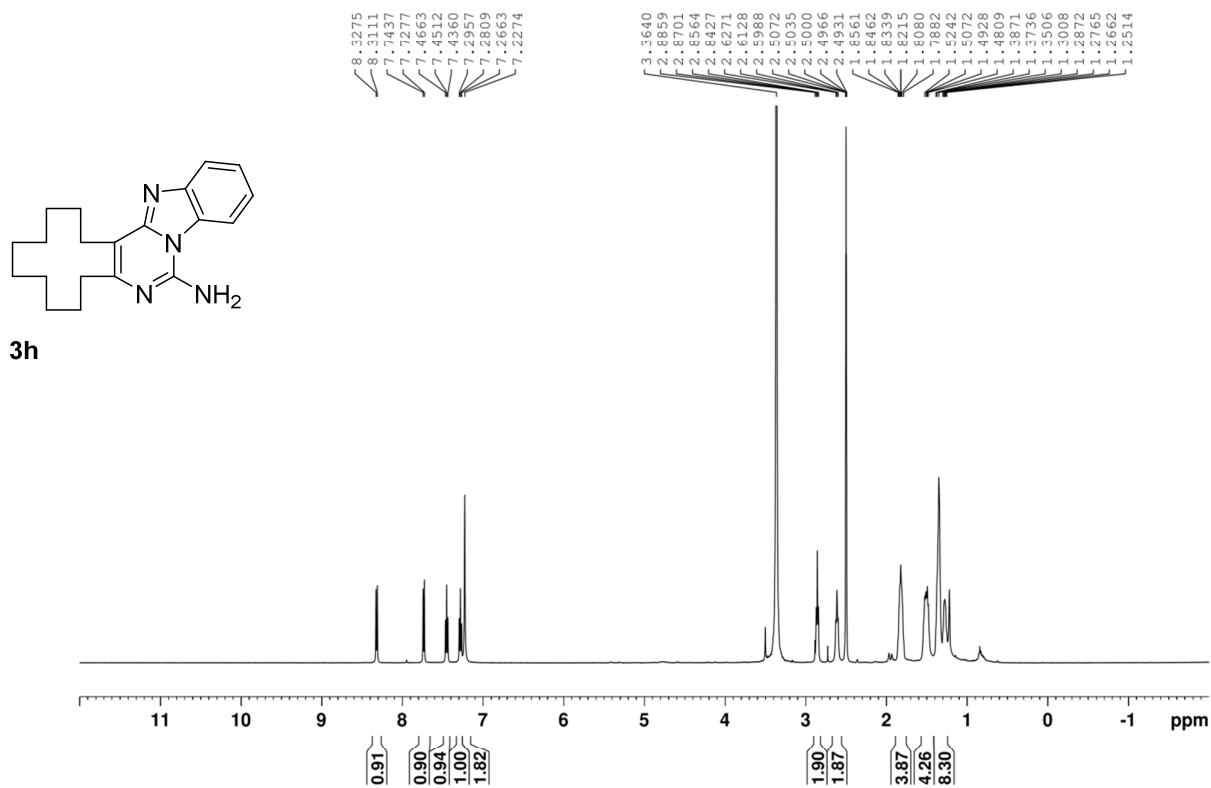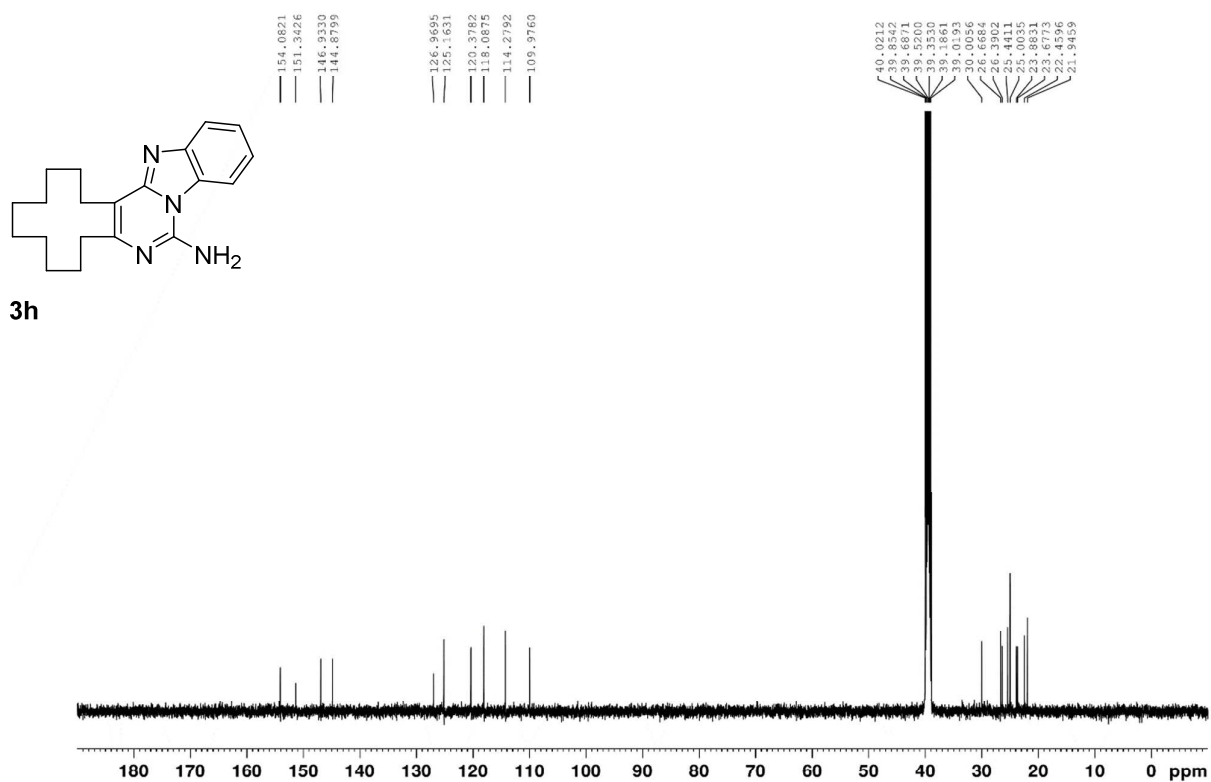

**Figure S9.**  $^1\text{H}$  and  $^{13}\text{C}$  NMR spectra of **3i**

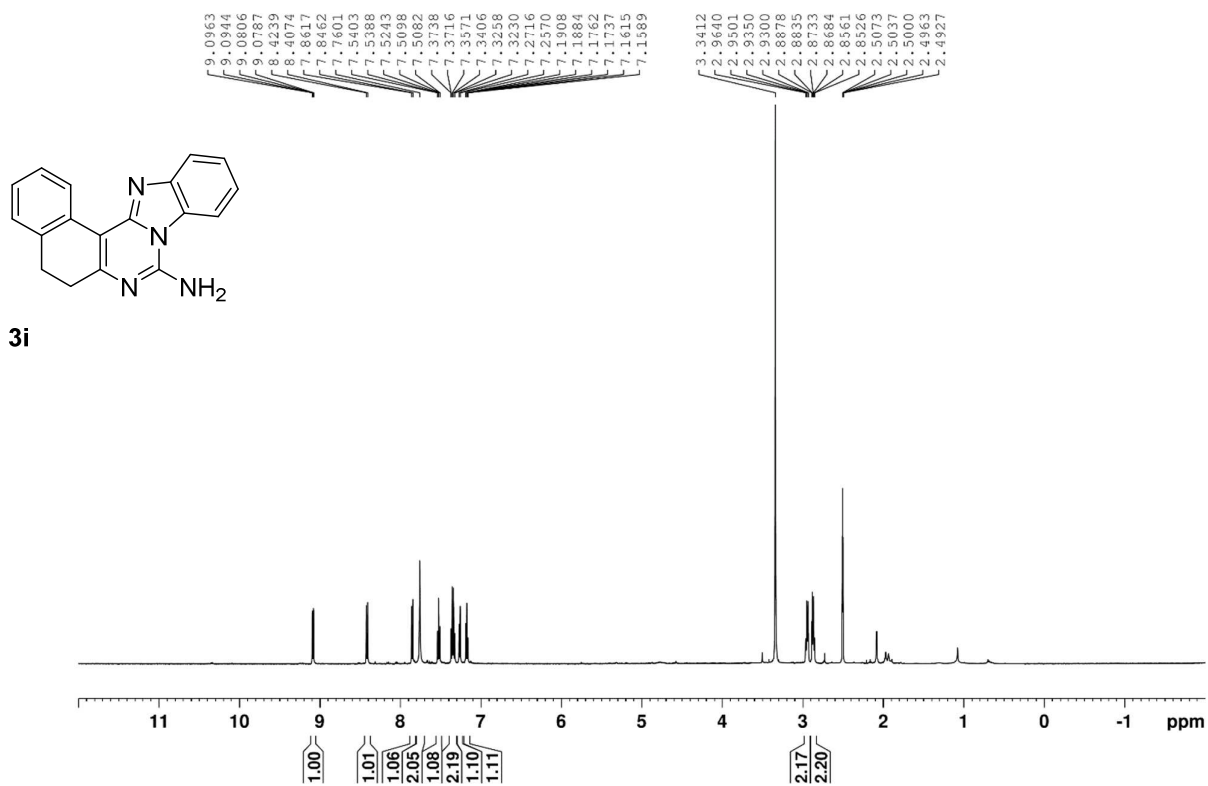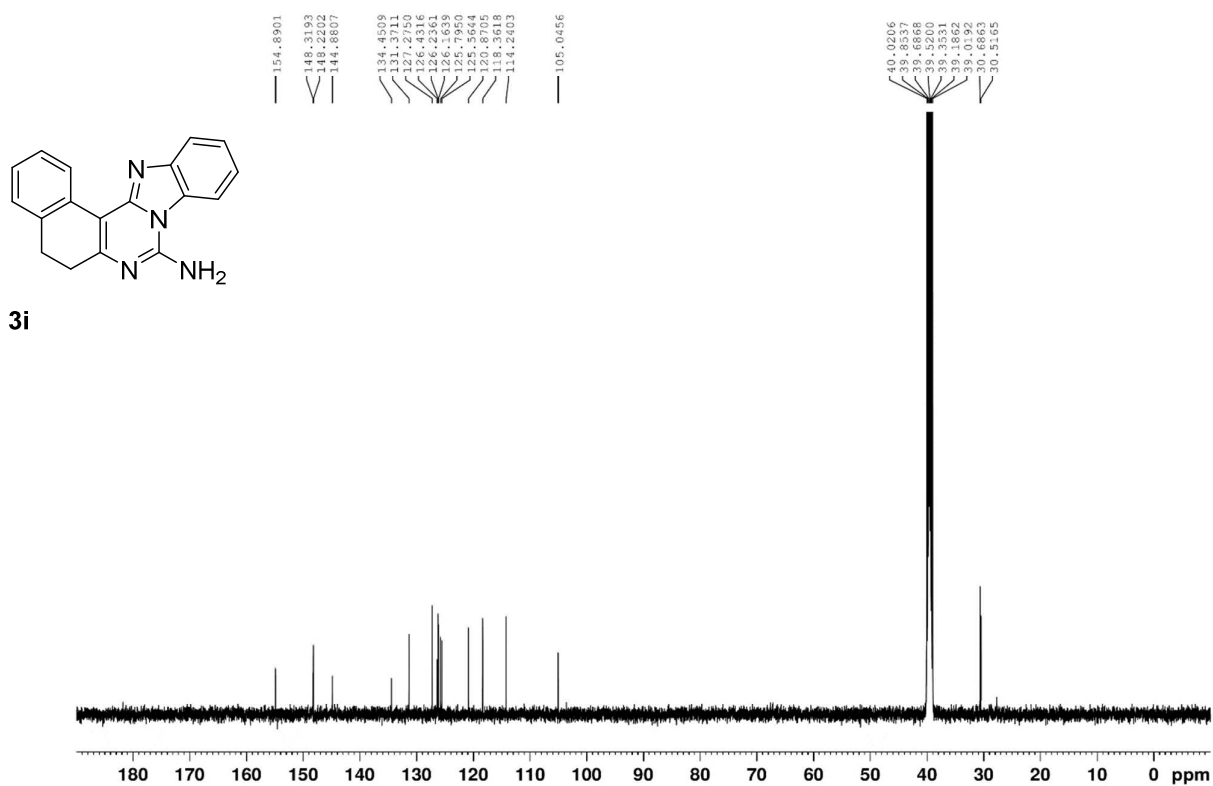

**Figure S10.**  $^1\text{H}$  and  $^{13}\text{C}$  NMR spectra of **3i'**

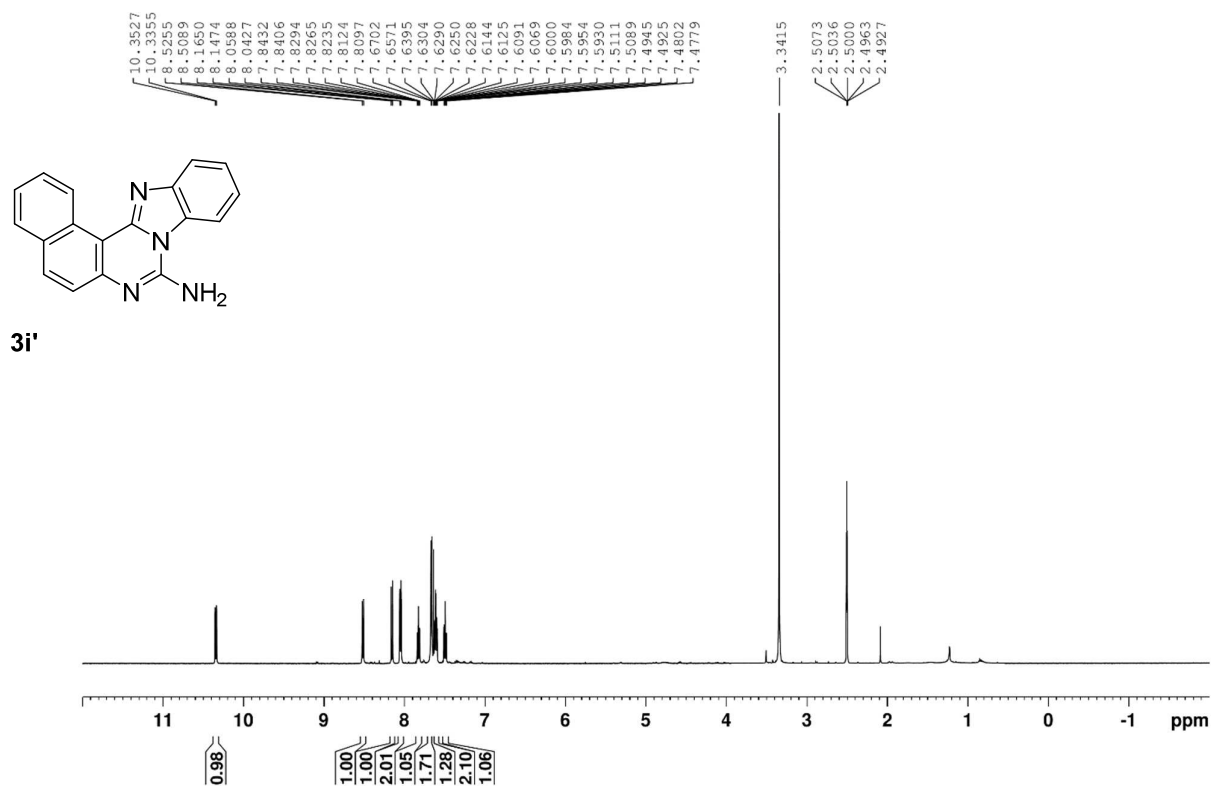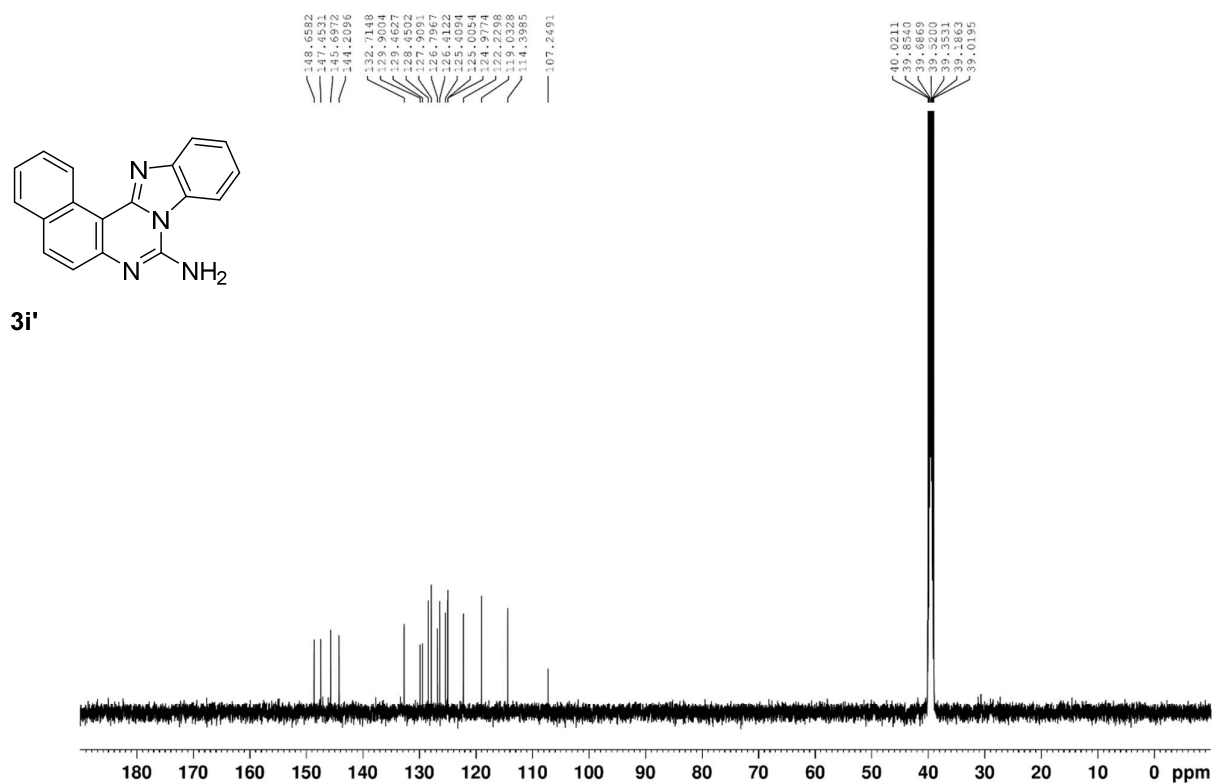

**Figure S11.**  $^1\text{H}$  and  $^{13}\text{C}$  NMR spectra of **3j**

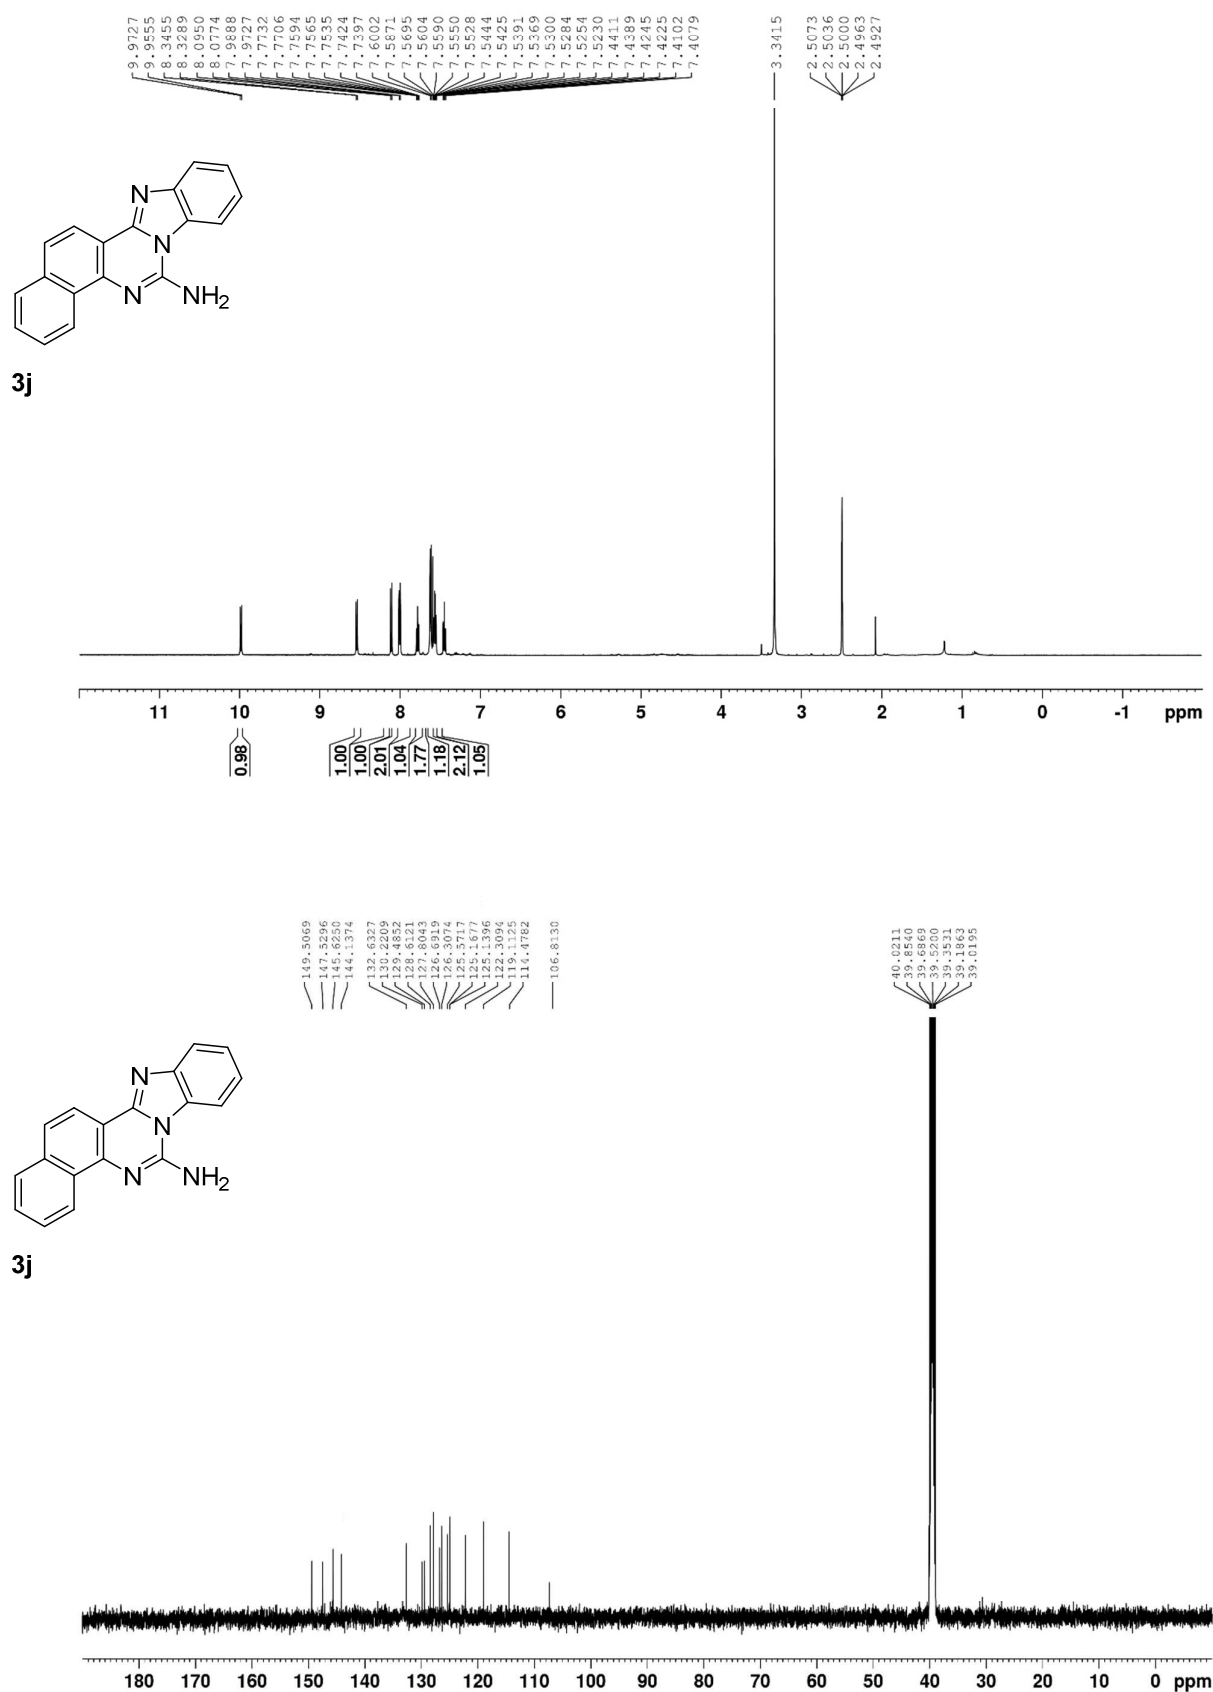



**Figure S12.**  $^1\text{H}$  and  $^{13}\text{C}$  NMR spectra of **3k**

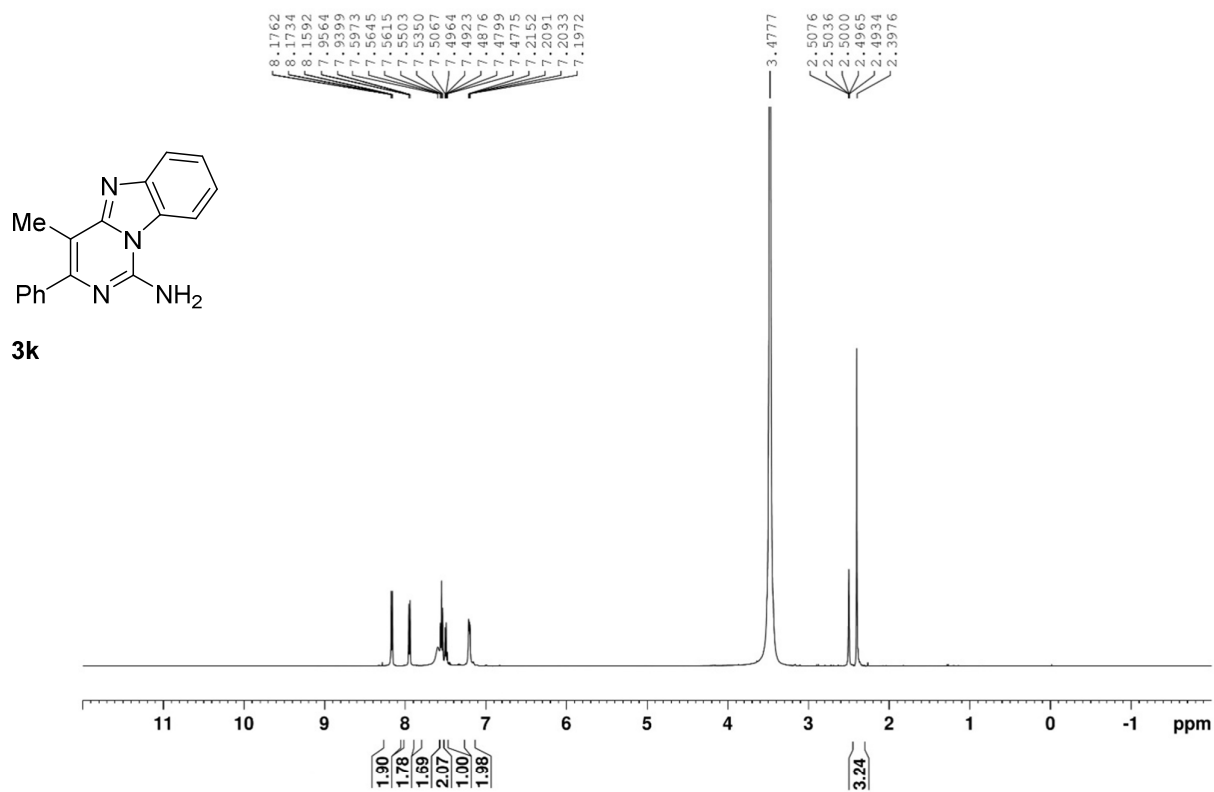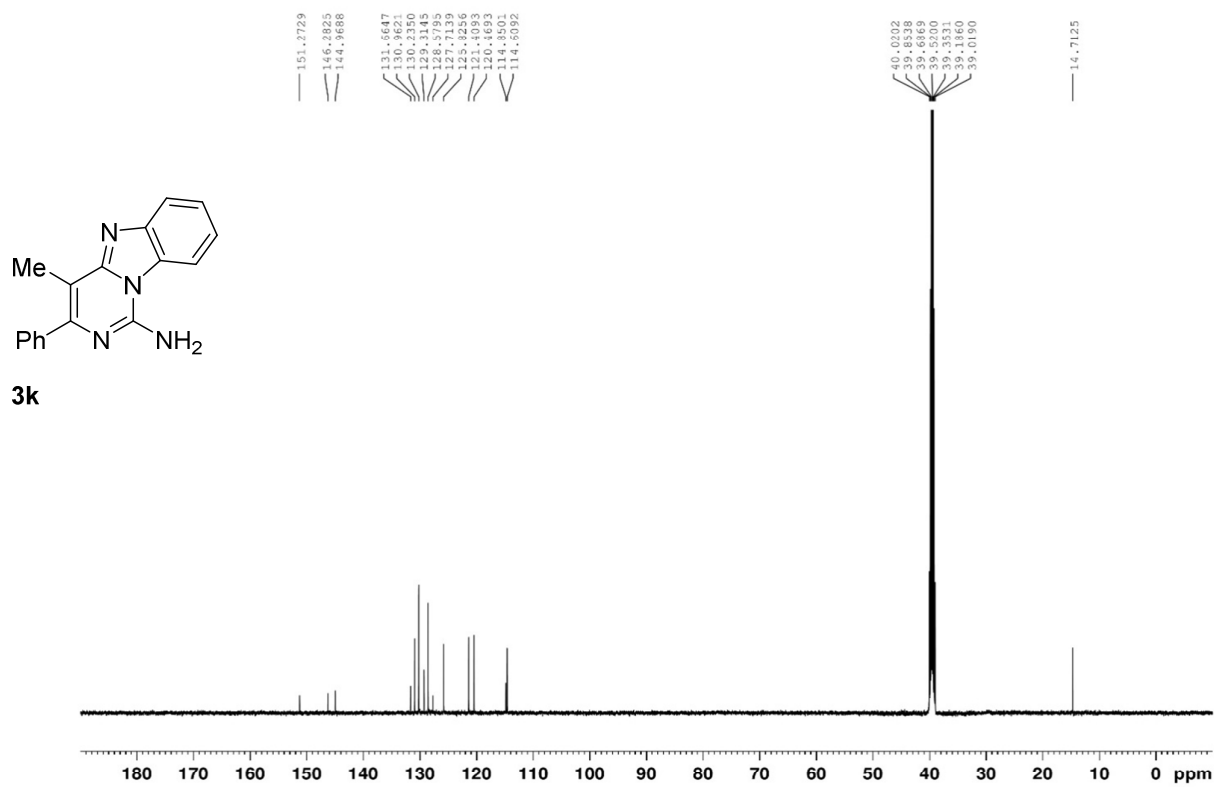

**Figure S13.**  $^1\text{H}$  and  $^{13}\text{C}$  NMR spectra of **3m**

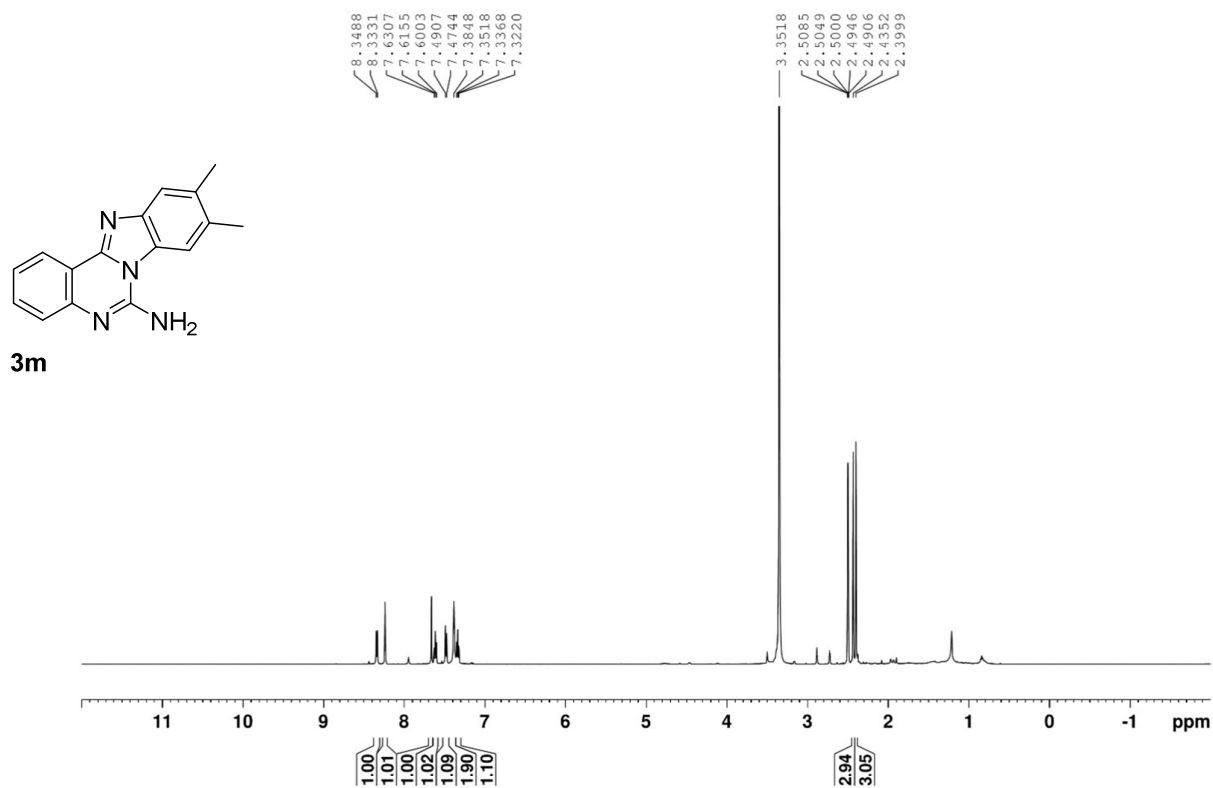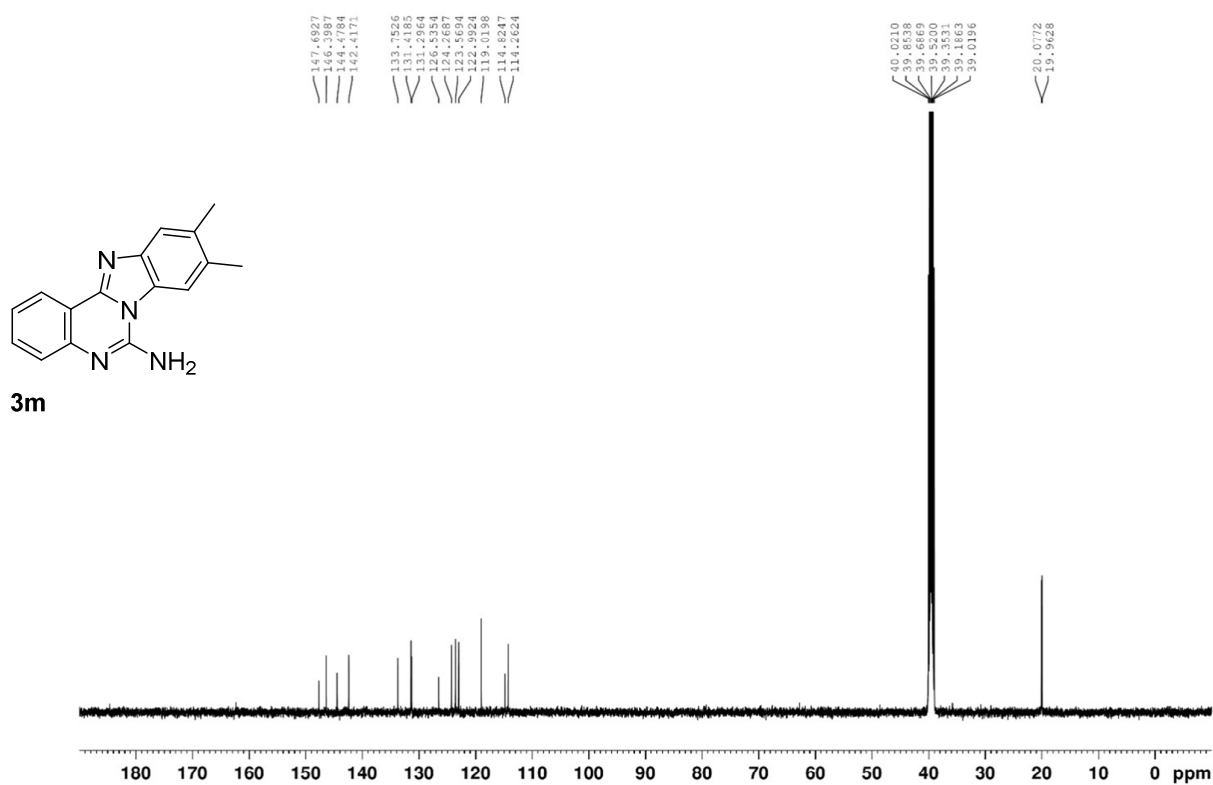

**Figure S14.**  $^1\text{H}$  and  $^{13}\text{C}$  NMR spectra of **3n**

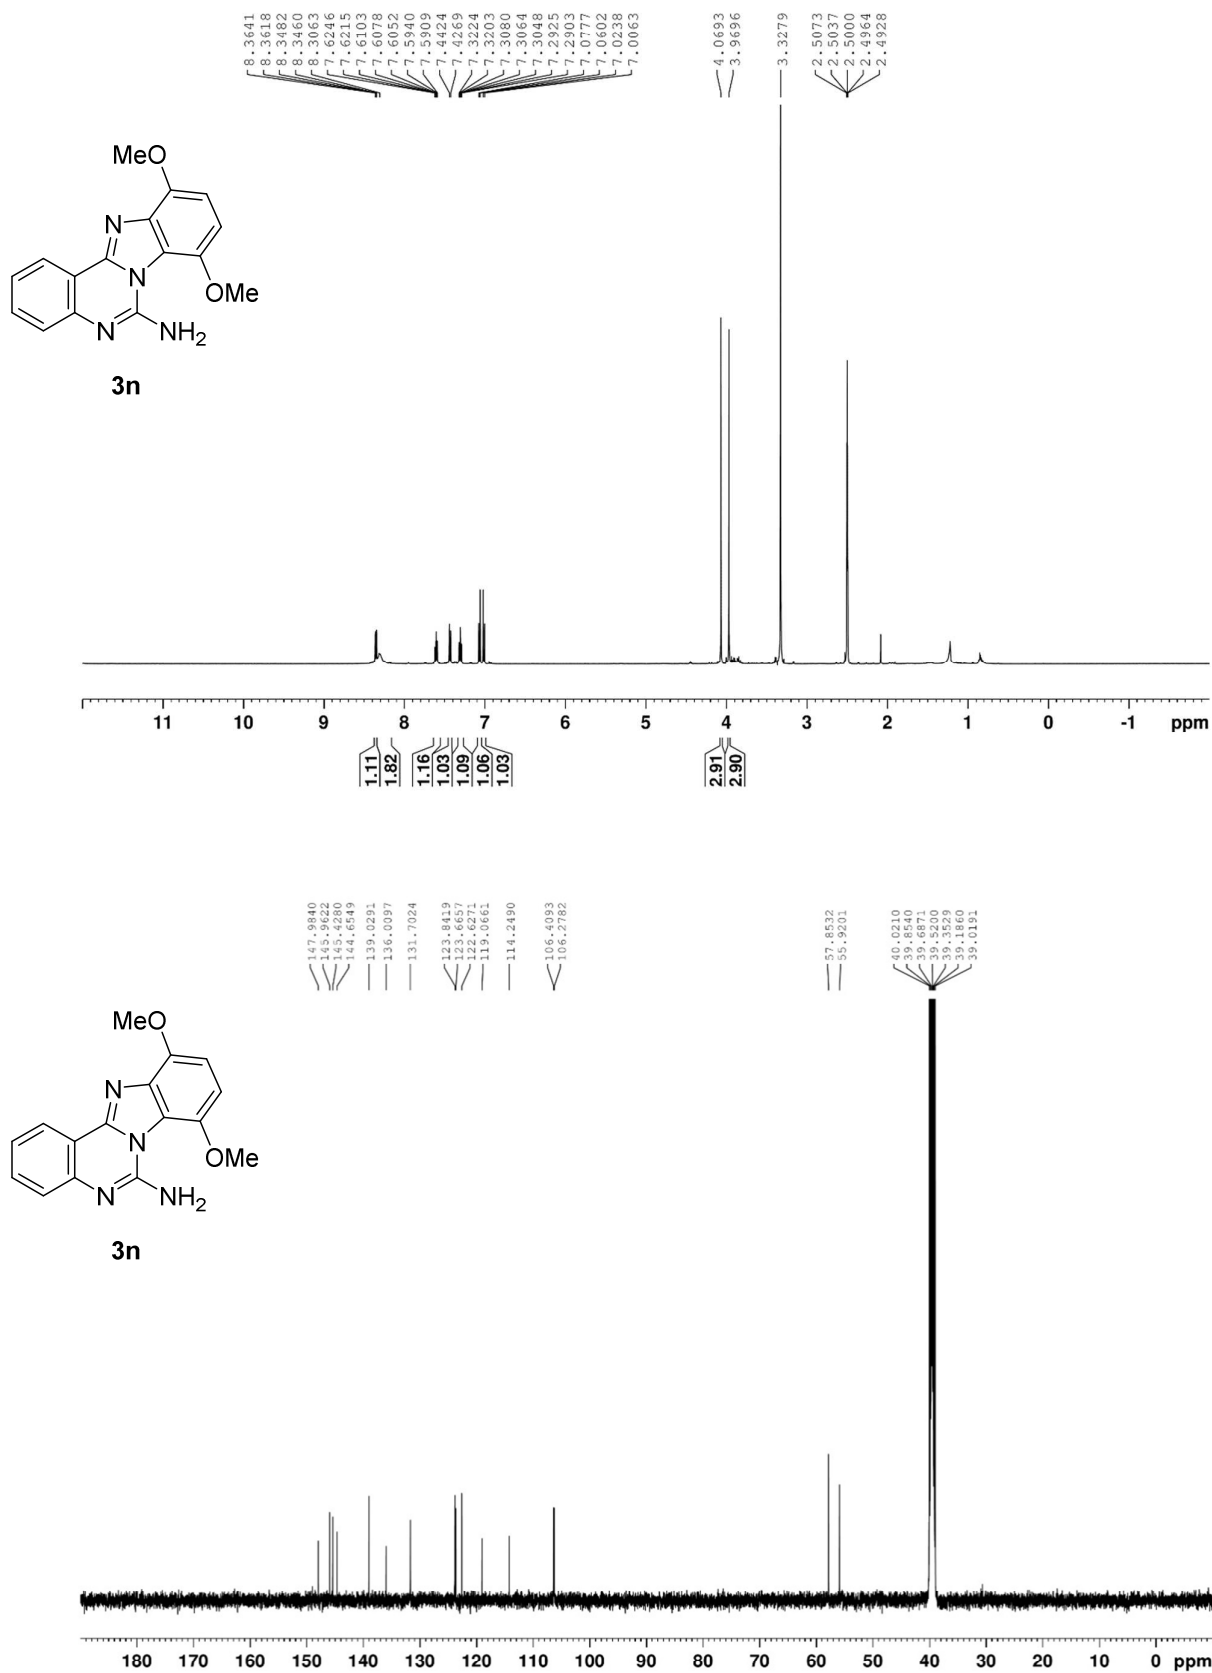

**Figure S15.**  $^1\text{H}$  and  $^{13}\text{C}$  NMR spectra of **3o**

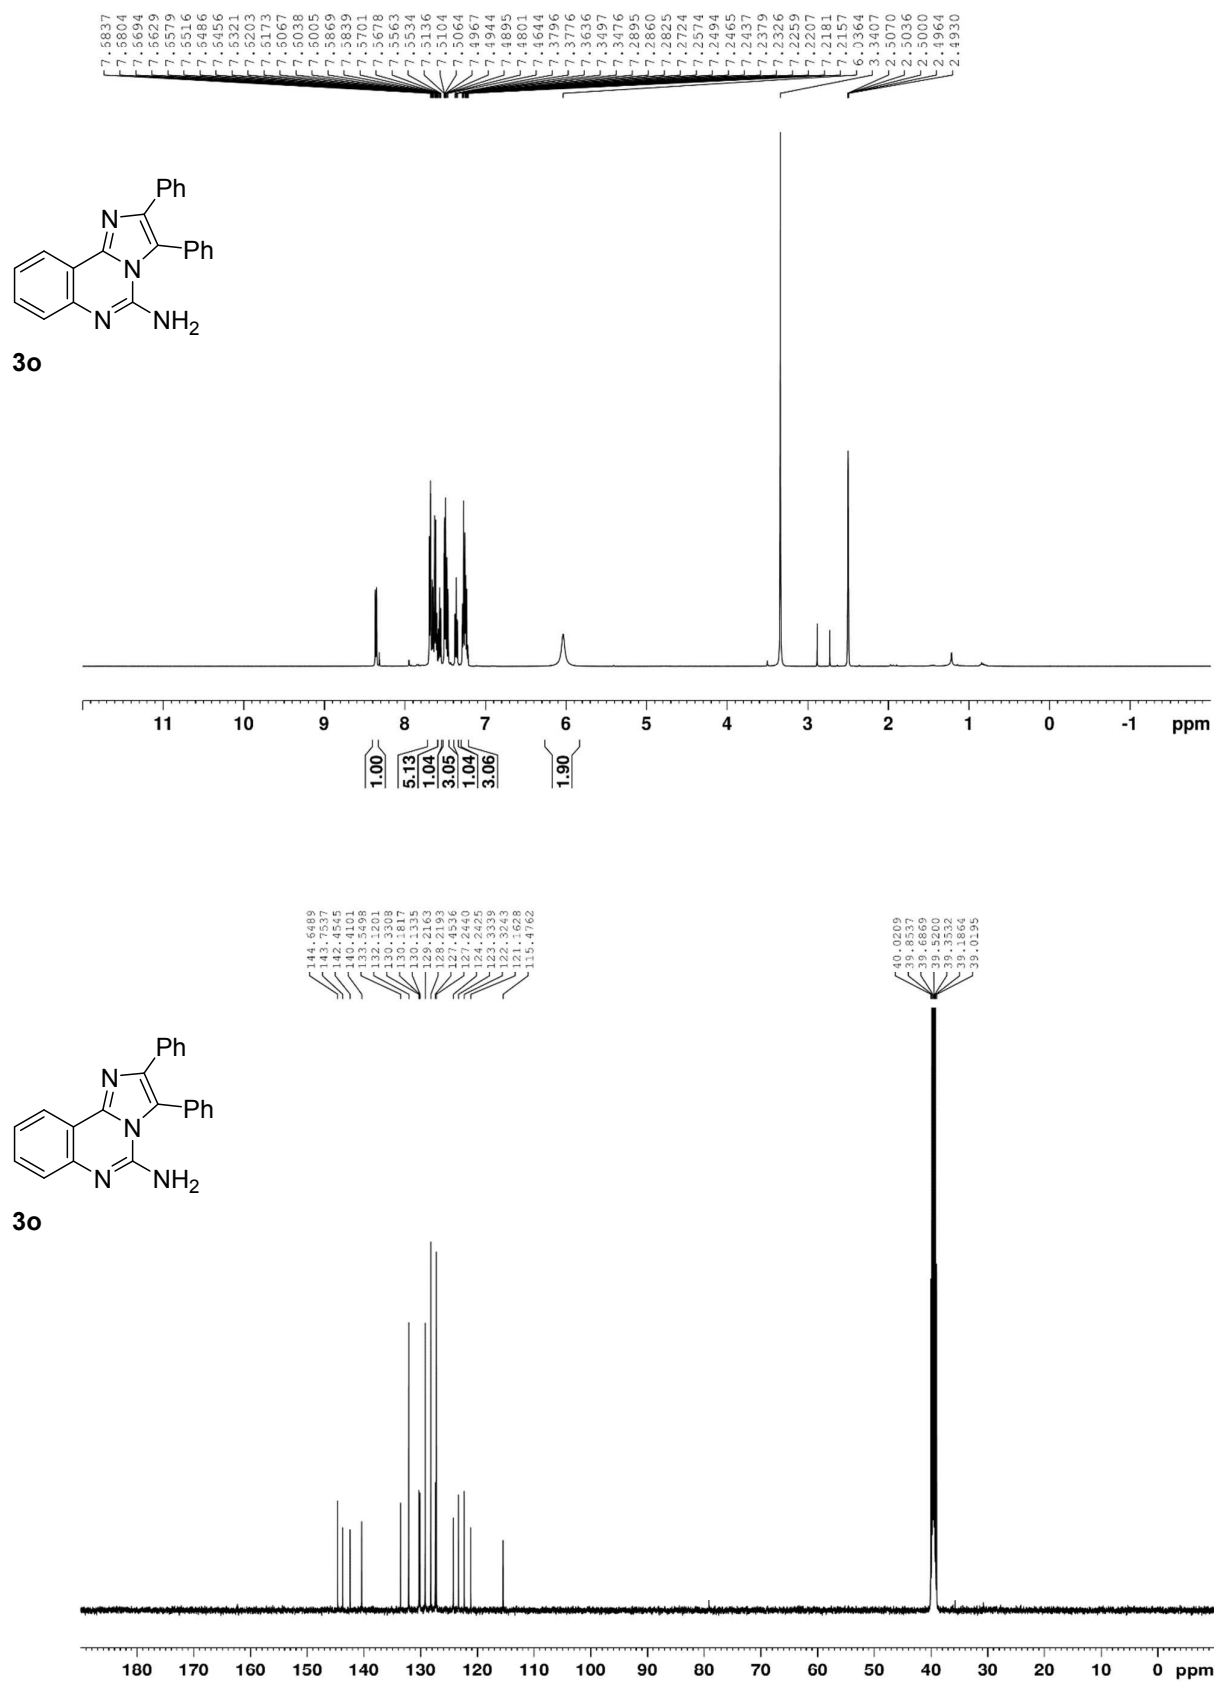

**Figure S16.**  $^1\text{H}$  and  $^{13}\text{C}$  NMR spectra of **5a**

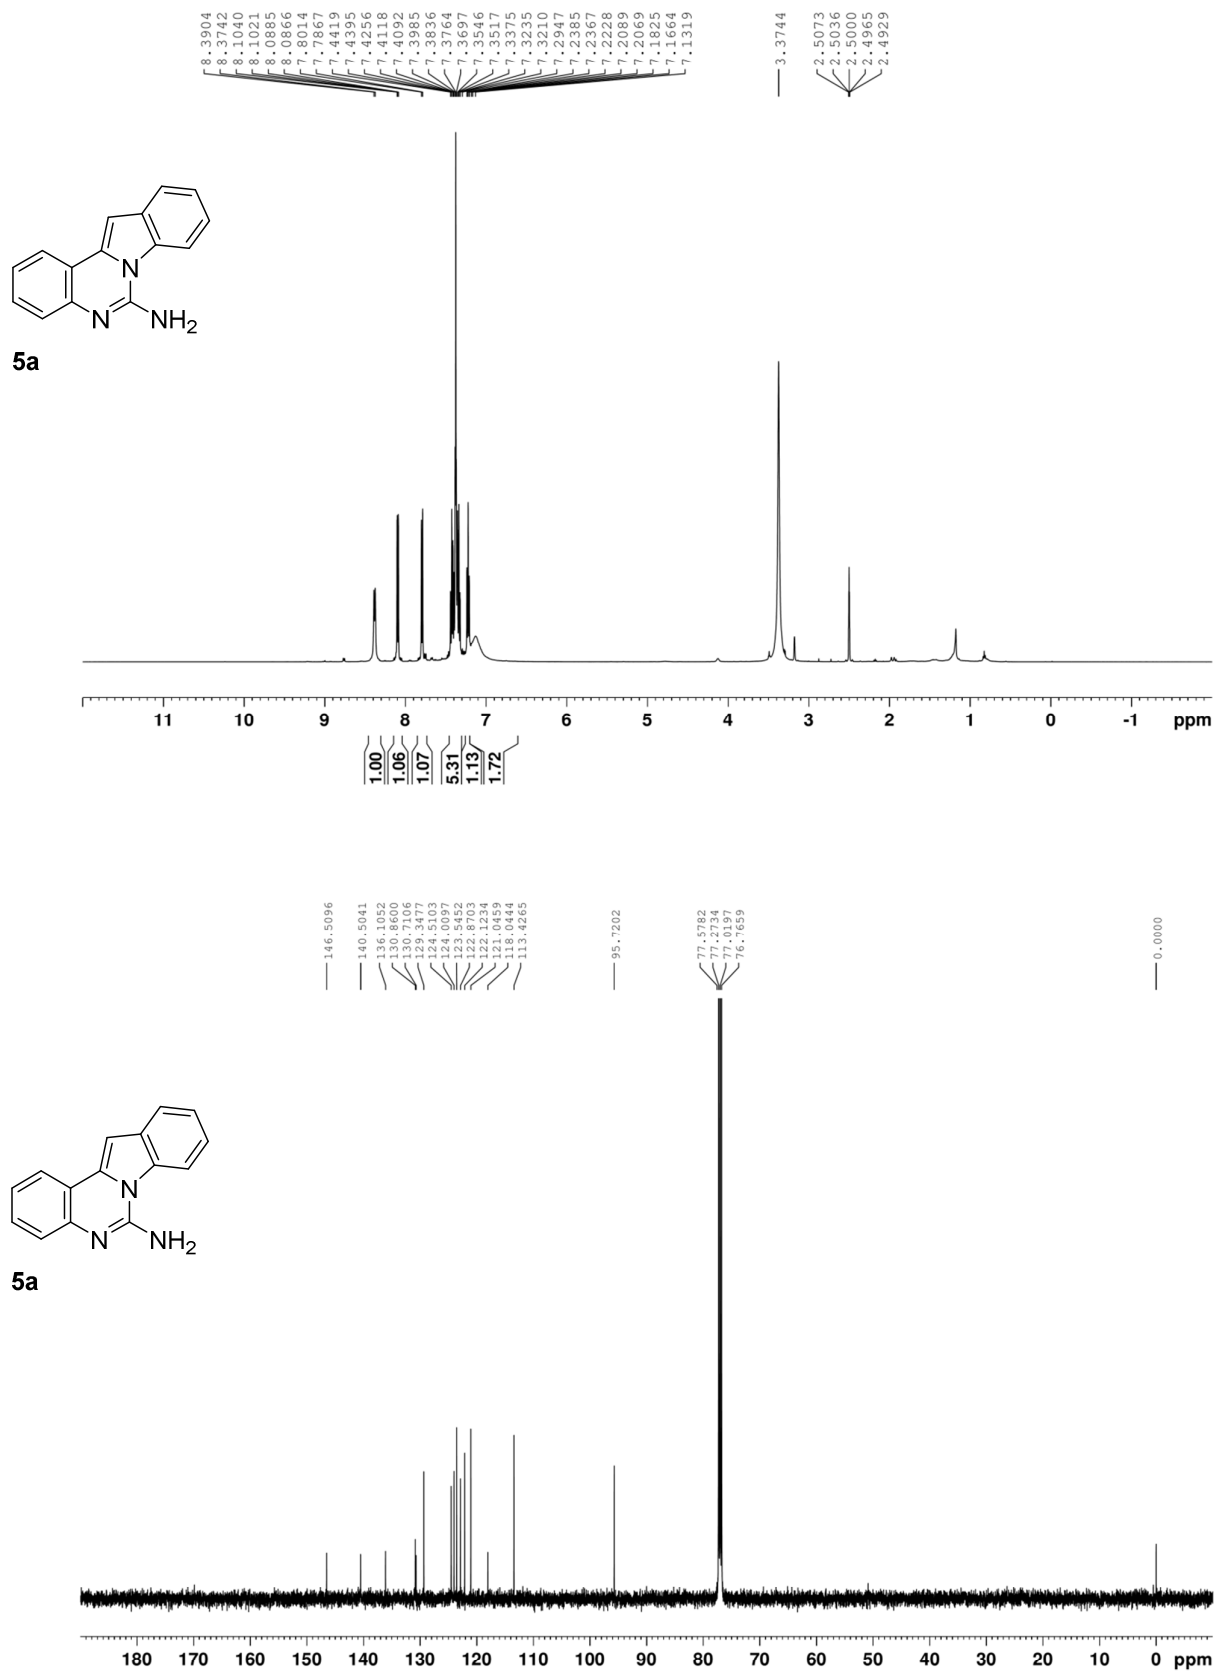

**Figure S17.**  $^1\text{H}$  and  $^{13}\text{C}$  NMR spectra of **5b**

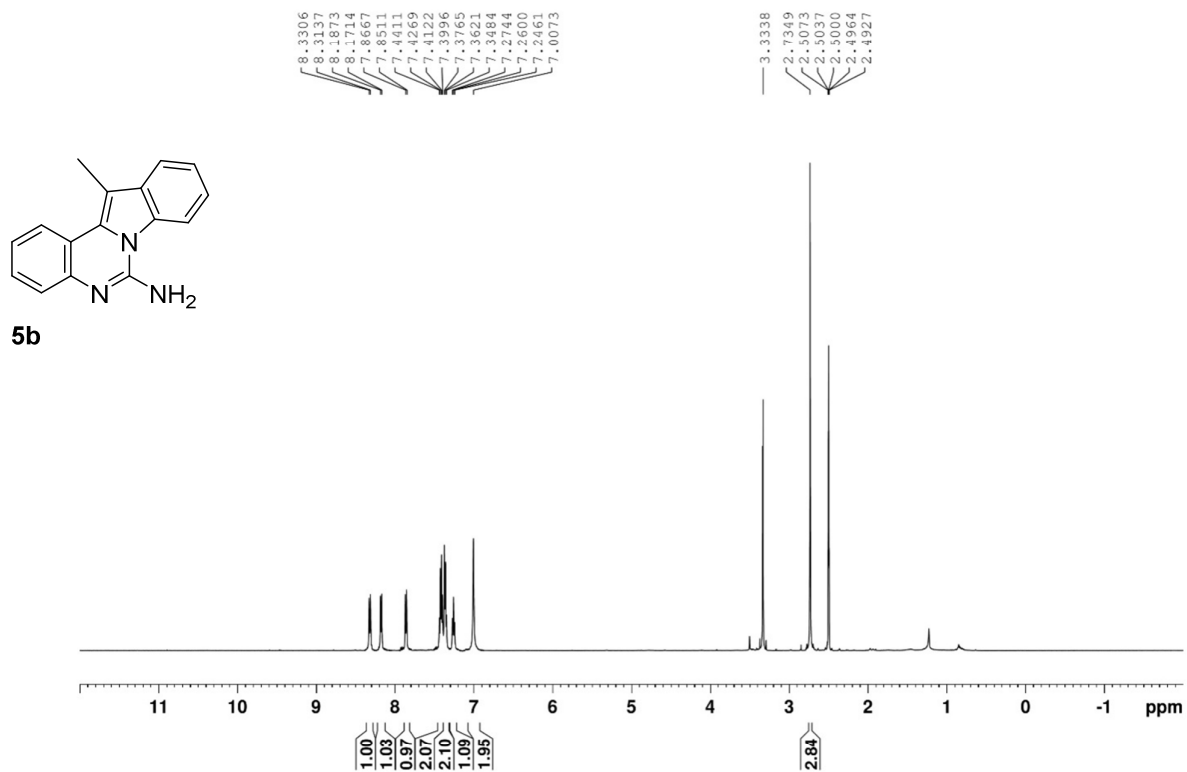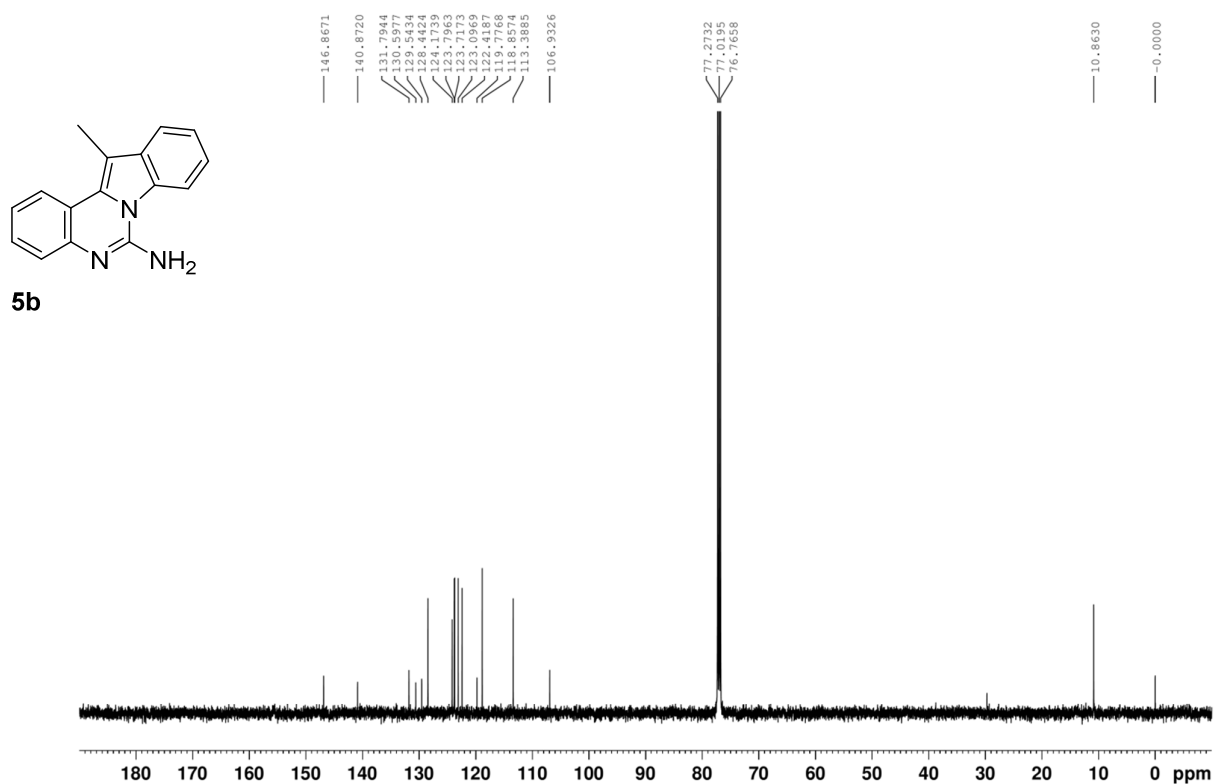

**Figure S18.**  $^1\text{H}$  and  $^{13}\text{C}$  NMR spectra of **5c**

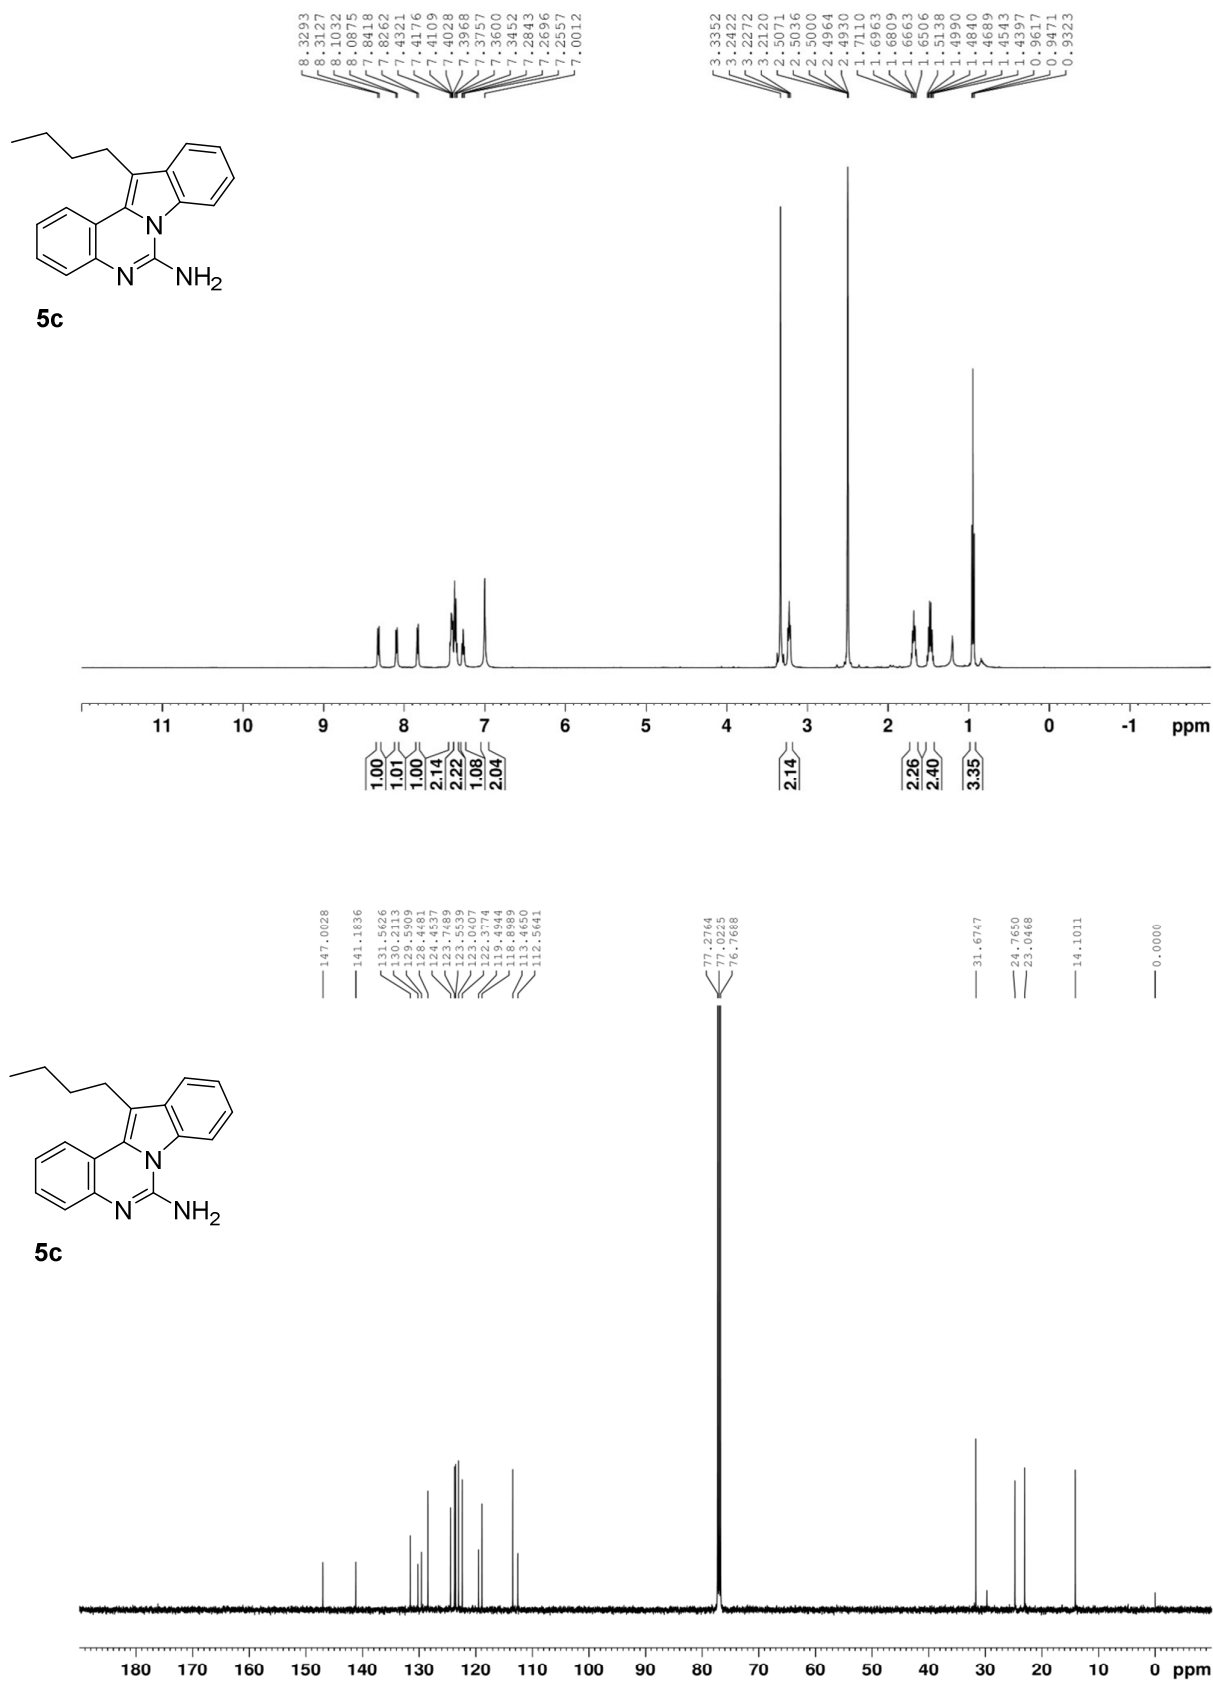

**Figure S19.**  $^1\text{H}$  and  $^{13}\text{C}$  NMR spectra of **5d**

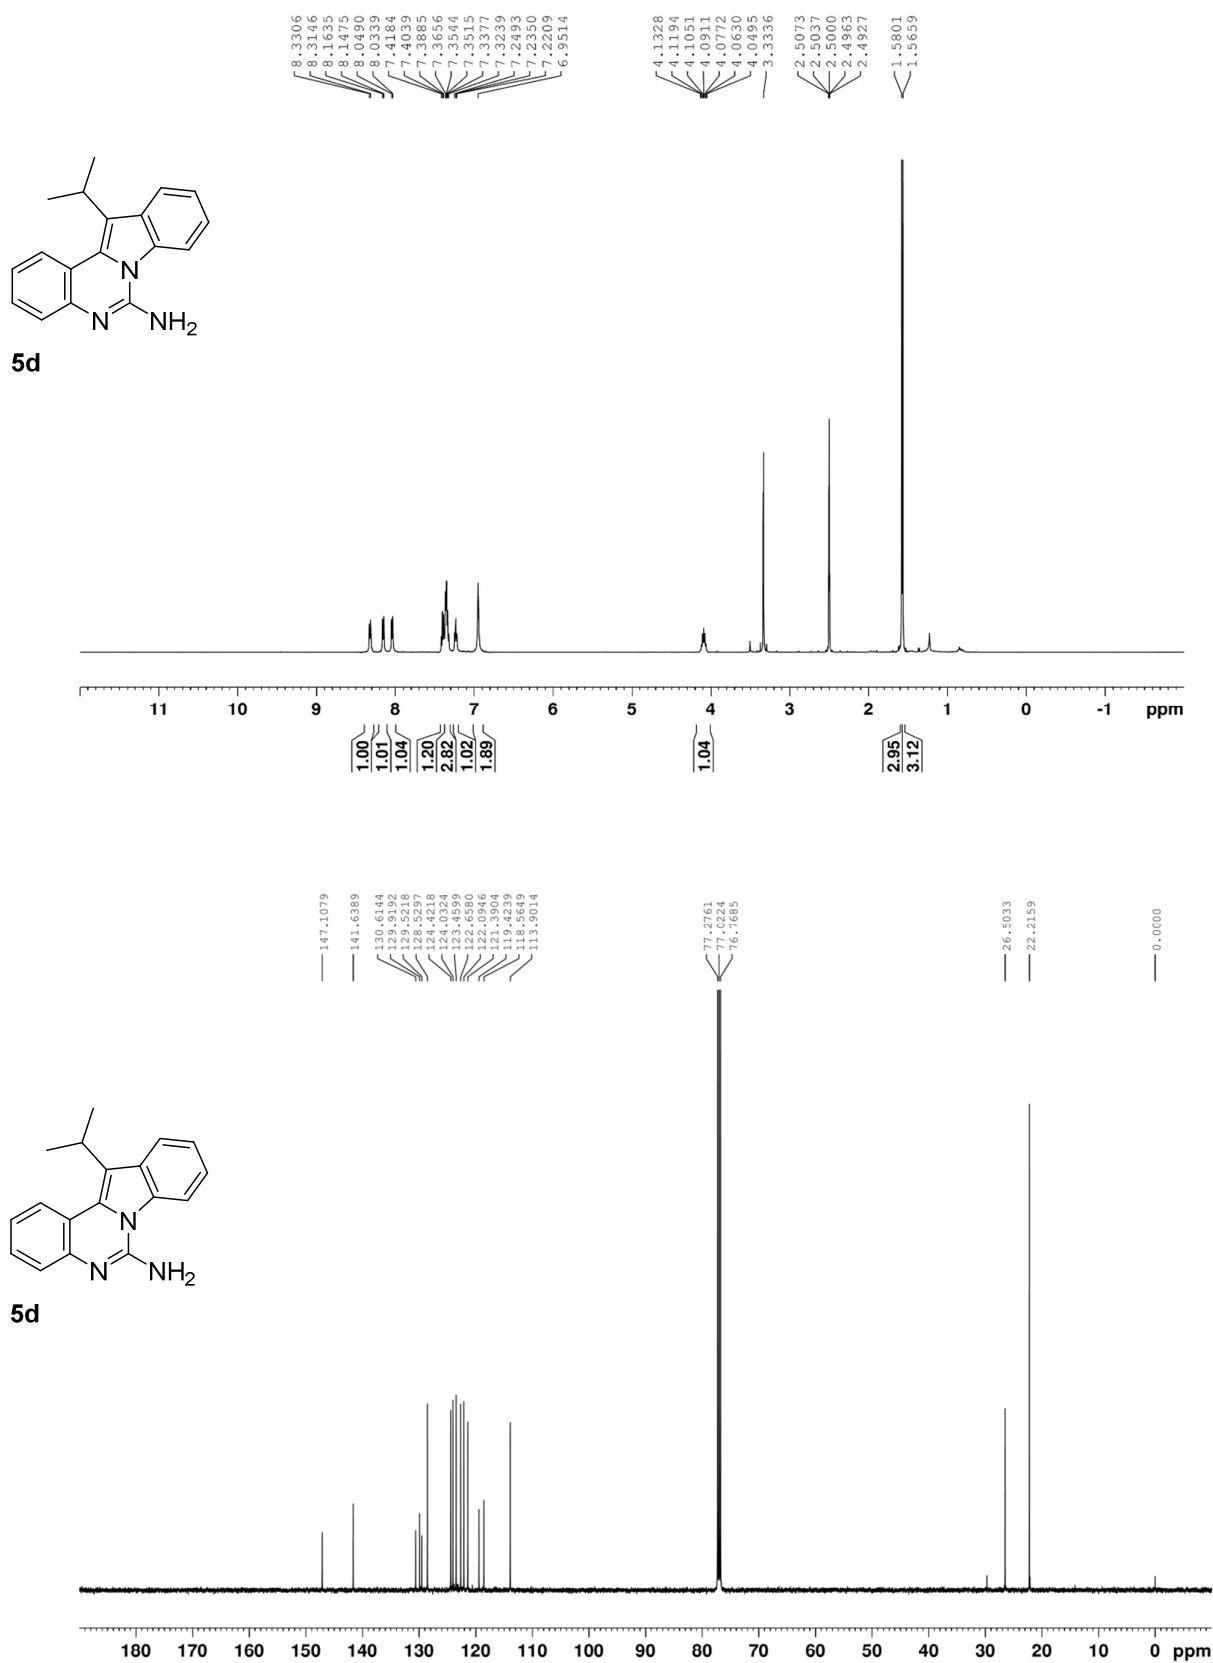



**Figure S20. HRMS spectrum of 3a**

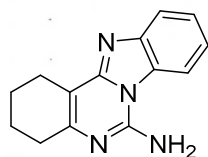

**3a**

[ Mass Spectrum ]  
Data : QD-310-C14H14N4 Date : 07-Sep-2016 13:45  
Sample: -  
Note: -  
Inlet : Direct Ion Mode : EI+  
Spectrum Type : Normal Ion (EF-Linear)  
RT : 0.93 min Scan# : (19,20)  
BP : m/z 238.1218 Int. : 14.65  
Output m/z range : 232.7478 to 243.3412 Cut Level : 0.00 %

[ Elemental Composition ]  
Data : QD-310-C14H14N4 Date : 07-Sep-2016 13:45  
Sample: -  
Note: -  
Inlet : Direct Ion Mode : EI+  
RT : 0.93 min Scan# : (19,20)  
Elements : C 14/0, H 14/0, N 4/0  
Mass Tolerance : 1000ppm, 1mmu if m/z < 1, 3mmu if m/z > 3  
Unsaturation (U.S.) : -0.5 - 100.0

| Observed m/z | Int%  | Err [ppm / mmu] | U.S. | Composition   |
|--------------|-------|-----------------|------|---------------|
| 210.0902     | 21.1  | -1.6 / -0.3     | 10.0 | C 12 H 10 N 4 |
| 237.1143     | 34.1  | +1.1 / +0.3     | 10.5 | C 14 H 13 N 4 |
| 238.1218     | 100.0 | -0.3 / -0.1     | 10.0 | C 14 H 14 N 4 |
| 239.1248     | 16.8  |                 |      |               |

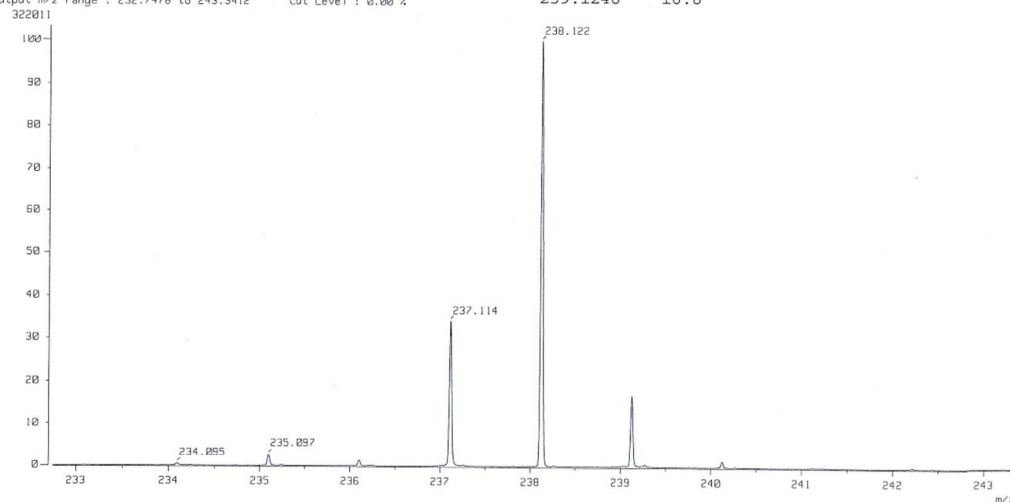

**Figure S21. HRMS spectrum of 3b**

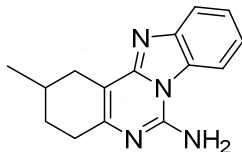

**3b**

[ Mass Spectrum ]  
Data : QD-316-HREI Date : 26-Jan-2017 13:53  
Sample: -  
Note: -  
Inlet : Direct Ion Mode : EI+  
Spectrum Type : Normal Ion (EF-Linear)  
RT : 0.83 min Scan# : (17,18)  
BP : m/z 252.1372 Int. : 95.54  
Output m/z range : 246.9588 to 258.4774 Cut Level : 0.00 %

[ Elemental Composition ]  
Data : QD-316-HREI Date : 26-Jan-2017 13:53  
Sample: -  
Note: -  
Inlet : Direct Ion Mode : EI+  
RT : 0.83 min Scan# : (17,18)  
Elements : C 15/0, H 16/0, N 4/0  
Mass Tolerance : 1000ppm, 1mmu if m/z < 1, 3mmu if m/z > 3  
Unsaturation (U.S.) : -0.5 - 100.0

| Observed m/z | Int%  | Err [ppm / mmu] | U.S. | Composition   |
|--------------|-------|-----------------|------|---------------|
| 251.1295     | 10.6  | -0.7 / -0.2     | 10.5 | C 15 H 15 N 4 |
| 252.1372     | 100.0 | -1.0 / -0.3     | 10.0 | C 15 H 16 N 4 |
| 253.1397     | 19.7  |                 |      |               |

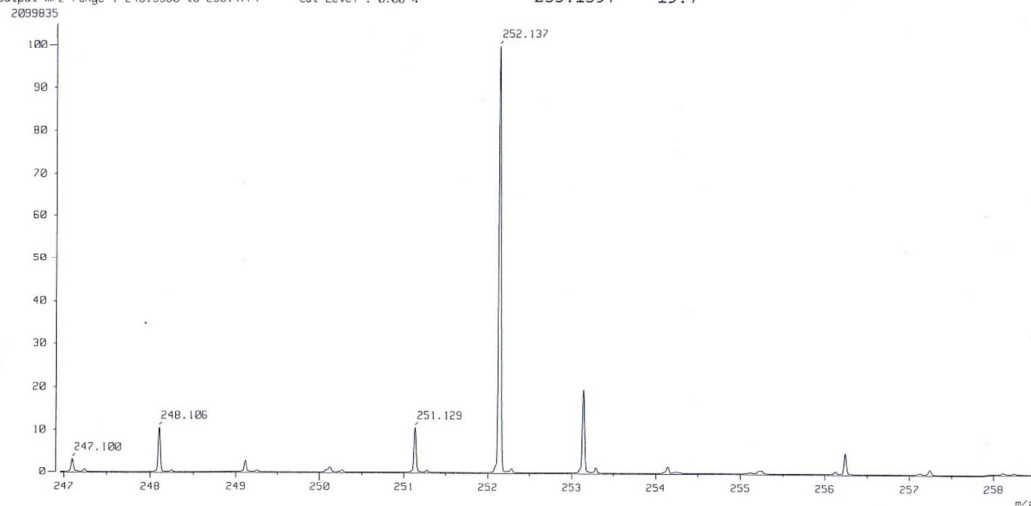

**Figure S22. HRMS spectrum of 3c**

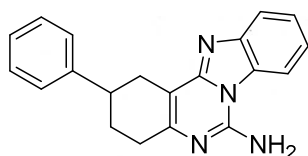

**3c**

[ Mass Spectrum ]  
Data : QD-326-HREI Date : 26-Jan-2017 14:14  
Sample: -  
Note: -  
Inlet : Direct Ion Mode : EI+  
Spectrum Type : Normal Ion (EF-Linear)  
RT : 0.63 min Scan# : (13,14)  
BP : m/z 314.1528 Int. : 34.12  
Output m/z range : 309.8234 to 319.9226 Cut Level : 0.00 %

[ Elemental Composition ]  
Data : QD-326-HREI Date : 26-Jan-2017 14:14  
Sample: -  
Note: -  
Inlet : Direct Ion Mode : EI+  
RT : 0.63 min Scan# : (13,14)  
Elements : C 20/0, H 18/0, N 4/0  
Mass Tolerance : 1000ppm, 1mmu if m/z < 1, 3mmu if m/z > 3  
Unsaturation (U.S.) : -0.5 - 100.0

| Observed m/z | Int%  | Err [ppm / mmu] | U.S. | Composition   |
|--------------|-------|-----------------|------|---------------|
| 314.1528     | 100.0 | -1.1 / -0.3     | 14.0 | C 20 H 18 N 4 |
| 315.1559     | 26.9  |                 |      |               |

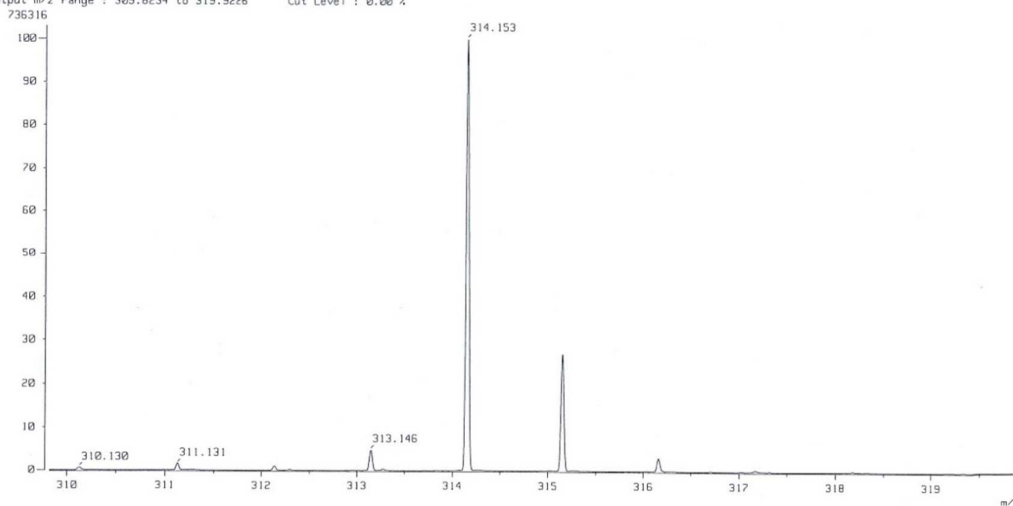

**Figure S23. HRMS spectrum of 3d**

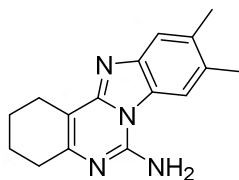

**3d**

[ Mass Spectrum ]  
Data : QD-323-HREI Date : 26-Jan-2017 14:06  
Sample: -  
Note: -  
Inlet : Direct Ion Mode : EI+  
Spectrum Type : Normal Ion (EF-Linear)  
RT : 0.98 min Scan# : (20,21)  
BP : m/z 266.1531 Int. : 63.72  
Output m/z range : 261.2500 to 271.3854 Cut Level : 0.00 %

[ Elemental Composition ]  
Data : QD-323-HREI Date : 26-Jan-2017 14:06  
Sample: -  
Note: -  
Inlet : Direct Ion Mode : EI+  
RT : 0.98 min Scan# : (20,21)  
Elements : C 16/0, H 18/0, N 4/0  
Mass Tolerance : 1000ppm, 1mmu if m/z < 1, 3mmu if m/z > 3  
Unsaturation (U.S.) : -0.5 - 100.0

| Observed m/z | Int%  | Err [ppm / mmu] | U.S. | Composition   |
|--------------|-------|-----------------|------|---------------|
| 251.1295     | 11.1  | -0.7 / -0.2     | 10.5 | C 15 H 15 N 4 |
| 252.1372     | 37.9  | -1.3 / -0.3     | 10.0 | C 15 H 16 N 4 |
| 265.1454     | 31.8  | +0.5 / +0.1     | 10.5 | C 16 H 17 N 4 |
| 266.1531     | 100.0 | -0.3 / -0.1     | 10.0 | C 16 H 18 N 4 |
| 267.1555     | 18.7  |                 |      |               |

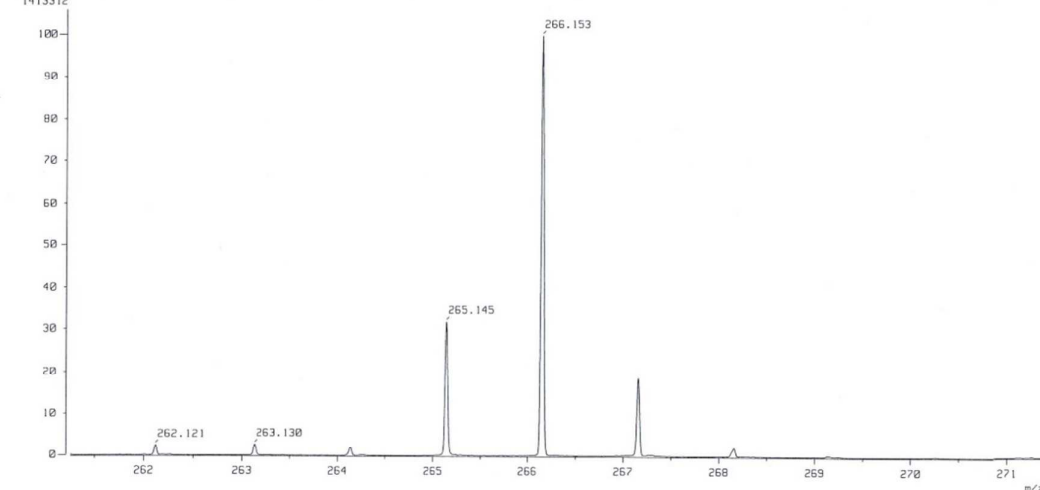

**Figure S24. HRMS spectrum of 3e**

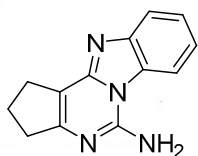

**3e**

[ Mass Spectrum ]  
Data : QD-317-HREI Date : 26-Jan-2017 13:58  
Sample: -  
Note: -  
Inlet : Direct Ion Mode: EI+  
Spectrum Type: Normal Ion (EF-Linear)  
RT : 0.48 min Scan#: (10,11)  
BP : m/z 224.1060 Int. : 66.30  
Output m/z range : 219.1406 to 229.0592 Cut Level : 0.00 %  
1465416

[ Elemental Composition ]  
Data : QD-317-HREI Date : 26-Jan-2017 13:58  
Sample: -  
Note: -  
Inlet : Direct Ion Mode: EI+  
RT : 0.48 min Scan#: (10,11)  
Elements : C 13/0, H 12/0, N 4/0  
Mass Tolerance : 1000ppm, 1mmu if m/z < 1, 3mmu if m/z > 3  
Unsaturation (U.S.) : -0.5 - 100.0

| Observed m/z | Int%  | Err [ppm / mmu] | U.S. Composition   |
|--------------|-------|-----------------|--------------------|
| 223.0987     | 64.1  | +1.4 / +0.3     | 10.5 C 13 H 11 N 4 |
| 224.1060     | 100.0 | -0.9 / -0.2     | 10.0 C 13 H 12 N 4 |
| 225.1082     | 14.5  |                 |                    |

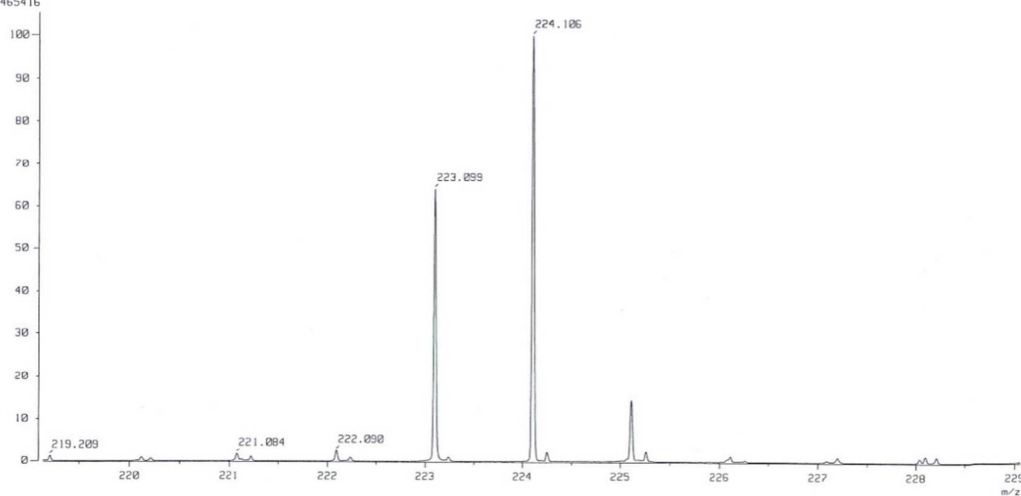

**Figure S25. HRMS spectrum of 3f**

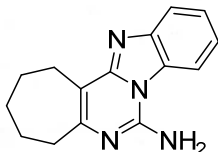

**3f**

[ Mass Spectrum ]  
Data : QD-311-HREI Date : 26-Jan-2017 13:46  
Sample: -  
Note: -  
Inlet : Direct Ion Mode: EI+  
Spectrum Type: Normal Ion (EF-Linear)  
RT : 0.48 min Scan#: (10,11)  
BP : m/z 252.1373 Int. : 40.34  
Output m/z range : 247.3744 to 256.3468 Cut Level : 0.00 %  
876081

[ Elemental Composition ]  
Data : QD-311-HREI Date : 26-Jan-2017 13:46  
Sample: -  
Note: -  
Inlet : Direct Ion Mode: EI+  
RT : 0.48 min Scan#: (10,11)  
Elements : C 15/0, H 16/0, N 4/0  
Mass Tolerance : 1000ppm, 1mmu if m/z < 1, 3mmu if m/z > 3  
Unsaturation (U.S.) : -0.5 - 100.0

| Observed m/z | Int%  | Err [ppm / mmu] | U.S. Composition   |
|--------------|-------|-----------------|--------------------|
| 237.1137     | 12.0  | -1.4 / -0.3     | 10.5 C 14 H 13 N 4 |
| 251.1294     | 16.5  | -1.2 / -0.3     | 10.5 C 15 H 15 N 4 |
| 252.1373     | 100.0 | -0.8 / -0.2     | 10.0 C 15 H 16 N 4 |
| 253.1408     | 18.1  |                 |                    |

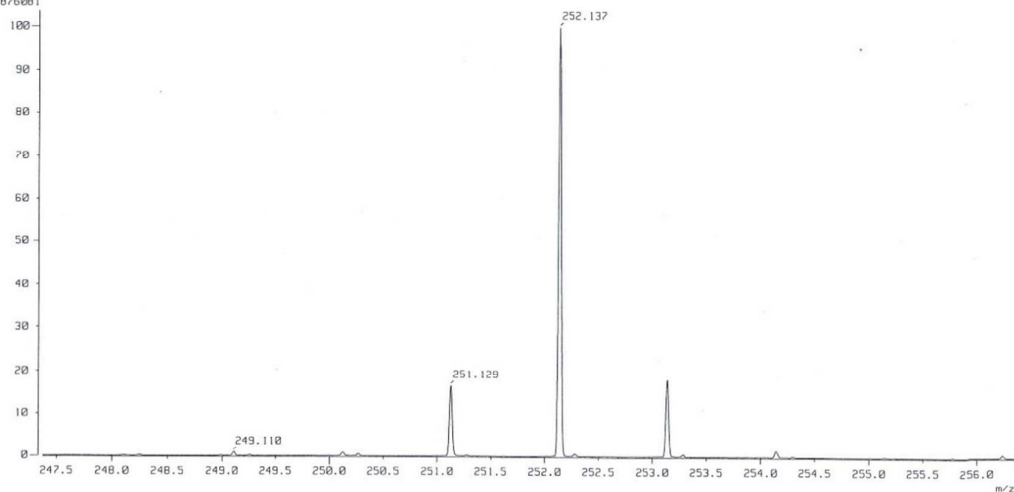

**Figure S26. HRMS spectrum of 3g**

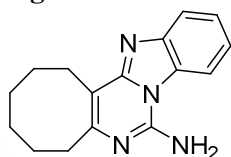

**3g**

[ Mass Spectrum ]  
Data : QD-328-HREI Date : 26-Jan-2017 14:18  
Sample: -  
Note: -  
Inlet : Direct Ion Mode : EI+  
Spectrum Type : Normal Ion [EF-Linear]  
RT : 0.98 min Scan# : (20,21)  
BP : m/z 266.1531 Int. : 53.72  
Output m/z range : 261.2500 to 271.3854 Cut Level : 0.00 %  
1413312

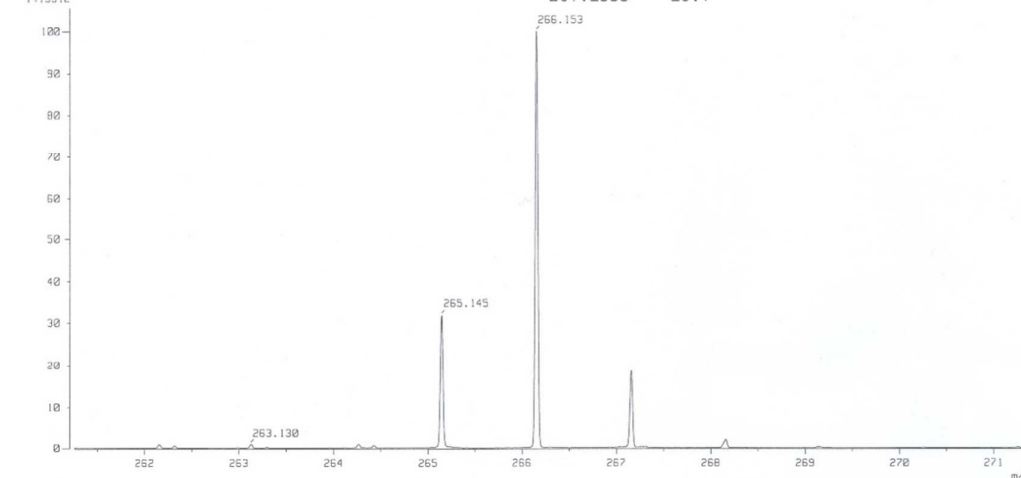

[ Elemental Composition ]  
Data : QD-328-HREI Date : 26-Jan-2017 14:18  
Sample: -  
Note: -  
Inlet : Direct Ion Mode : EI+  
RT : 0.98 min Scan# : (20,21)  
Elements : C 16/0, H 18/0, N 4/0  
Mass Tolerance : 1000ppm, 1mmu if m/z < 1, 3mmu if m/z > 3  
Unsaturation (U.S.) : -0.5 - 100.0

| Observed m/z | Int%  | Err[ppm / mmu] | U.S. | Composition   |
|--------------|-------|----------------|------|---------------|
| 251.1295     | 11.1  | -0.7 / -0.2    | 10.5 | C 15 H 15 N 4 |
| 252.1372     | 37.9  | -1.3 / -0.3    | 10.0 | C 15 H 16 N 4 |
| 265.1454     | 31.8  | +0.5 / +0.1    | 10.5 | C 16 H 17 N 4 |
| 266.1531     | 100.0 | -0.3 / -0.1    | 10.0 | C 16 H 18 N 4 |
| 267.1555     | 18.7  |                |      |               |

**Figure S27. HRMS spectrum of 3h**

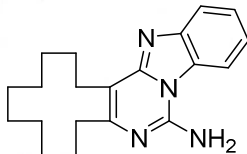

**3h**

[ Mass Spectrum ]  
Data : QD-329-C20H26N4 Date : 12-Dec-2016 16:11  
Sample: -  
Note: -  
Inlet : Direct Ion Mode : EI+  
Spectrum Type : Normal Ion [EF-Linear]  
RT : 1.73 min Scan# : (35,36)  
BP : m/z 322.2159 Int. : 66.07  
Output m/z range : 316.6588 to 327.6973 Cut Level : 0.00 %  
1463620

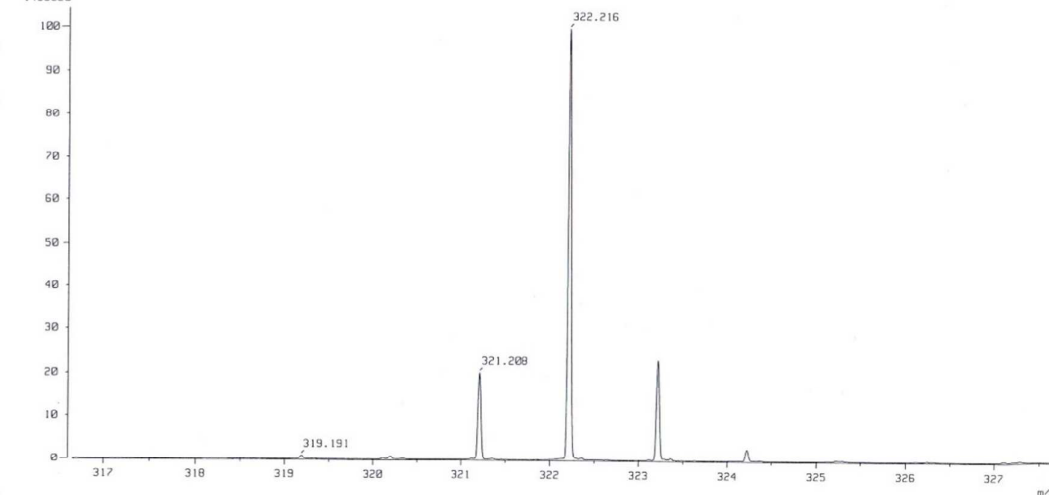

[ Elemental Composition ]  
Data : QD-329-C20H26N4 Date : 12-Dec-2016 16:11  
Sample: -  
Note: -  
Inlet : Direct Ion Mode : EI+  
RT : 1.73 min Scan# : (35,36)  
Elements : C 20/0, H 26/0, N 4/0  
Mass Tolerance : 1000ppm, 1mmu if m/z < 1, 3mmu if m/z > 3  
Unsaturation (U.S.) : -0.5 - 100.0

| Observed m/z | Int%  | Err[ppm / mmu] | U.S. | Composition   |
|--------------|-------|----------------|------|---------------|
| 293.1767     | 13.4  | +0.2 / +0.0    | 10.5 | C 18 H 21 N 4 |
| 321.2083     | 20.2  | +1.1 / +0.4    | 10.5 | C 20 H 25 N 4 |
| 322.2159     | 100.0 | +0.6 / +0.2    | 10.0 | C 20 H 26 N 4 |
| 323.2198     | 23.3  |                |      |               |

**Figure S28. HRMS spectrum of 3i**

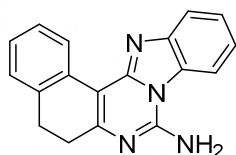

**3i**

[ Mass Spectrum ]  
Data : QD-330U-C18H14N4 Date : 12-Dec-2016 16:24  
Sample: -  
Note: -  
Inlet : Direct Ion Mode : EI+  
Spectrum Type : Normal Ion (EF-Linear)  
RT : 1.28 min Scan# : (26,27)  
BP : m/z 286.1219 Int. : 34.19  
Output m/z range : 280.4807 to 291.2522 Cut Level : 0.00 %  
751887

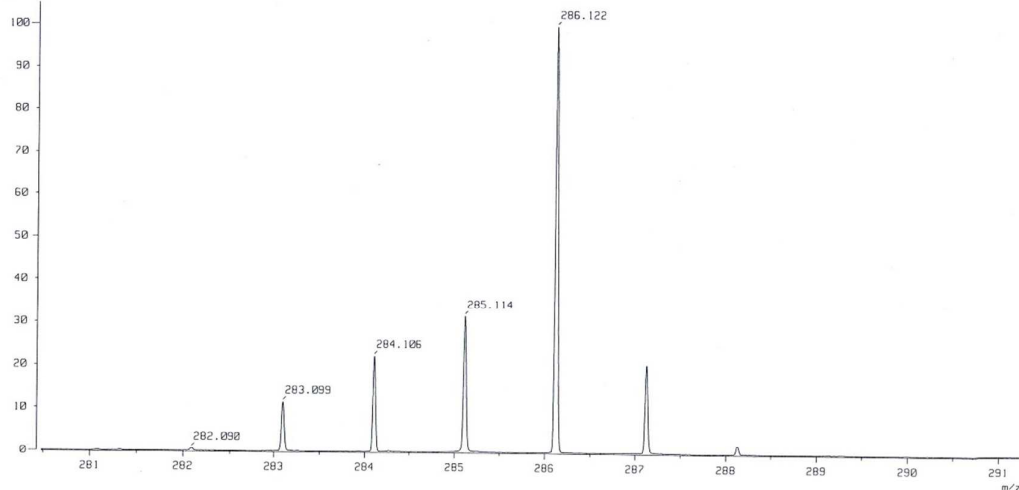

[ Elemental Composition ]  
Data : QD-330U-C18H14N4 Date : 12-Dec-2016 16:24  
Sample: -  
Note: -  
Inlet : Direct Ion Mode : EI+  
RT : 1.28 min Scan# : (26,27)  
Elements : C 18/0, H 14/0, N 4/0  
Mass Tolerance : 1000ppm, 1mmu if m/z < 1, 3mmu if m/z > 3  
Unsaturation (U.S.) : -0.5 - 100.0

| Observed m/z | Int%  | Err [ppm / mmu] | U.S. Composition   |
|--------------|-------|-----------------|--------------------|
| 283.0986     | 11.5  | +0.8 / +0.2     | 15.5 C 18 H 11 N 4 |
| 284.1060     | 22.3  | -0.8 / -0.2     | 15.0 C 18 H 12 N 4 |
| 285.1140     | 31.6  | -0.1 / +0.0     | 14.5 C 18 H 13 N 4 |
| 286.1219     | 100.0 | +0.4 / +0.1     | 14.0 C 18 H 14 N 4 |
| 287.1255     | 20.7  |                 |                    |

**Figure S29. HRMS spectrum of 3i'**

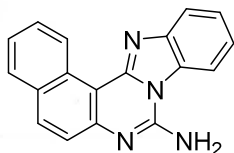

**3i'**

[ Mass Spectrum ]  
Data : QD-330-HREI Date : 26-Jan-2017 14:23  
Sample: -  
Note: -  
Inlet : Direct Ion Mode : EI+  
Spectrum Type : Normal Ion (EF-Linear)  
RT : 0.53 min Scan# : (11,12)  
BP : m/z 284.1060 Int. : 58.36  
Output m/z range : 278.6598 to 289.4983 Cut Level : 0.00 %  
1250795

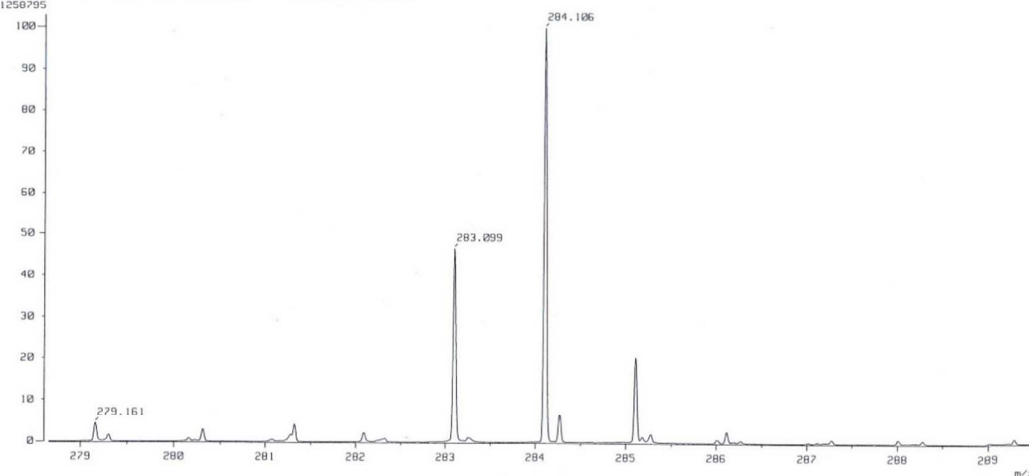

[ Elemental Composition ]  
Data : QD-330-HREI Date : 26-Jan-2017 14:23  
Sample: -  
Note: -  
Inlet : Direct Ion Mode : EI+  
RT : 0.53 min Scan# : (11,12)  
Elements : C 18/0, H 12/0, N 4/0  
Mass Tolerance : 1000ppm, 1mmu if m/z < 1, 3mmu if m/z > 3  
Unsaturation (U.S.) : -0.5 - 100.0

| Observed m/z | Int%  | Err [ppm / mmu] | U.S. Composition   |
|--------------|-------|-----------------|--------------------|
| 283.0986     | 46.5  | +0.7 / +0.2     | 15.5 C 18 H 11 N 4 |
| 284.1060     | 100.0 | -0.7 / -0.2     | 15.0 C 18 H 12 N 4 |
| 285.1089     | 20.4  |                 |                    |

**Figure S30. HRMS spectrum of 3j**

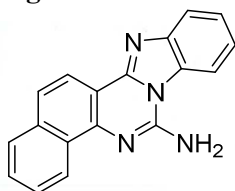

**3j**

[ Mass Spectrum ]  
Data : QD-333-C18H12N4 Date : 12-Dec-2016 16:19  
Sample: -  
Note : -  
Inlet : Direct Ion Mode : EI+  
Spectrum Type : Normal Ion (EF-Linear)  
RT : 0.88 min Scan# : (18,19)  
BP : m/z 284.1060 Int. : 72.53  
Output m/z range : 278.9674 to 288.4926 Cut Level : 0.00 %  
1587515

[ Elemental Composition ]  
Data : QD-333-C18H12N4 Date : 12-Dec-2016 16:19  
Sample: -  
Note : -  
Inlet : Direct Ion Mode : EI+  
RT : 0.88 min Scan# : (18,19)  
Elements : C 18/0, H 12/0, N 4/0  
Mass Tolerance : 1000ppm, 1mmu if m/z < 1, 3mmu if m/z > 3  
Unsaturation (U.S.) : -0.5 - 100.0

| Observed m/z | Int%  | Err [ppm / mmu] | U.S. | Composition   |
|--------------|-------|-----------------|------|---------------|
| 283.0986     | 45.5  | +0.9 / +0.3     | 15.5 | C 18 H 11 N 4 |
| 284.1060     | 100.0 | -0.7 / -0.2     | 15.0 | C 18 H 12 N 4 |
| 285.1091     | 20.7  |                 |      |               |

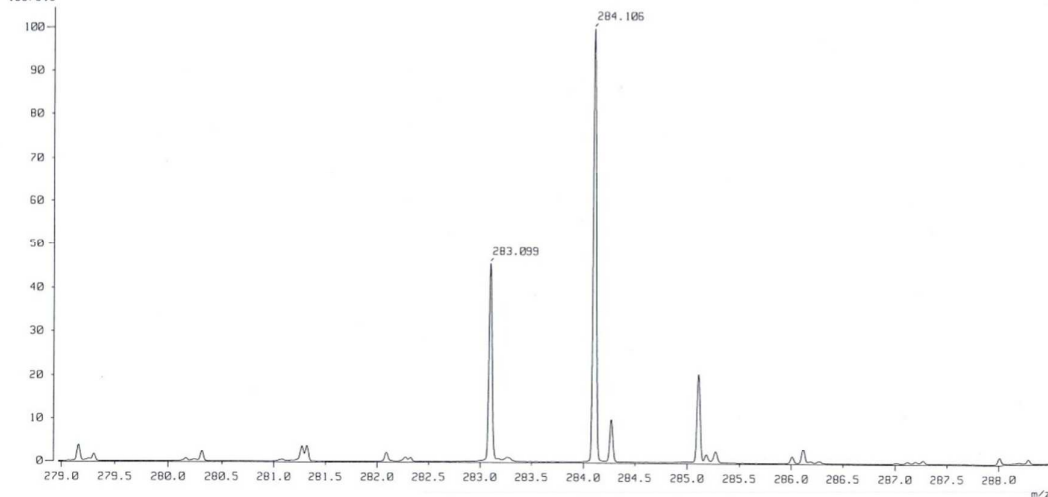

**Figure S31. HRMS spectrum of 3k**

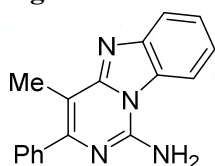

**3k**

[ Mass Spectrum ]  
Data : QD-380-HREI Date : 29-Mar-2017 09:34  
Sample: -  
Note : -  
Inlet : Direct Ion Mode : EI+  
Spectrum Type : Normal Ion (EF-Linear)  
RT : 1.00 min Scan# : 21  
BP : m/z 274.1220 Int. : 60.90  
Output m/z range : 268.7685 to 280.4985 Cut Level : 0.00 %  
669555

[ Elemental Composition ]  
Data : QD-380-HREI Date : 29-Mar-2017 09:34  
Sample: -  
Note : -  
Inlet : Direct Ion Mode : EI+  
RT : 1.00 min Scan# : 21  
Elements : C 17/0, H 14/0, N 4/0  
Mass Tolerance : 1000ppm, 1mmu if m/z < 1, 3mmu if m/z > 3  
Unsaturation (U.S.) : -0.5 - 100.0

| Observed m/z | Int%  | Err [ppm / mmu] | U.S. | Composition   |
|--------------|-------|-----------------|------|---------------|
| 261.1030     | 18.6  | -0.6 / -0.1     | 12.5 | C 16 H 13 N 4 |
| 273.1033     | 41.3  | +0.7 / +0.2     | 13.5 | C 17 H 13 N 4 |
| 274.1220     | 100.0 | +0.3 / +0.1     | 13.0 | C 17 H 14 N 4 |
| 275.1150     | 27.8  |                 |      |               |
| 276.1244     | 21.9  |                 |      |               |

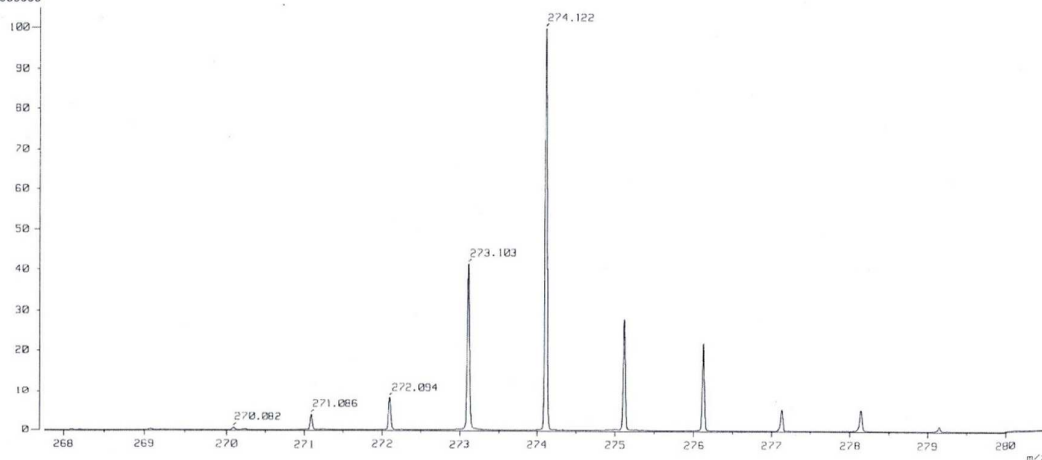

**Figure S32. HRMS spectrum of 3m**

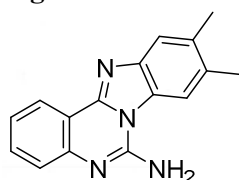

**3m**

[ Mass Spectrum ]  
Data : QD-324-C16H14N4 Date : 12-Dec-2016 15:57  
Sample: -  
Note: -  
Inlet : Direct Ion Mode : EI+  
Spectrum Type : Normal Ion [EF-Linear]  
RT : 1.13 min Scan#: (23,24)  
BP : m/z 262.1215 Int. : 26.81  
Output m/z range : 255.5905 to 269.3205 Cut Level : 0.00 %

[ Elemental Composition ]  
Data : QD-324-C16H14N4 Date : 12-Dec-2016 15:57  
Sample: -  
Note: -  
Inlet : Direct Ion Mode : EI+  
RT : 1.13 min Scan#: (23,24)  
Elements : C 16/0, H 14/0, N 4/0  
Mass Tolerance : 1000ppm, 1mmu if m/z < 1, 3mmu if m/z > 3  
Unsaturation (U.S.) : -0.5 - 100.0

| Observed m/z | Int%  | Err[ppm / mmu] | U.S. | Composition   |
|--------------|-------|----------------|------|---------------|
| 247.0986     | 16.8  | +0.9 / +0.2    | 12.5 | C 15 H 11 N 4 |
| 261.1142     | 34.6  | +0.7 / +0.2    | 12.5 | C 16 H 13 N 4 |
| 262.1215     | 100.0 | -1.2 / -0.3    | 12.0 | C 16 H 14 N 4 |
| 263.1243     | 19.4  |                |      |               |

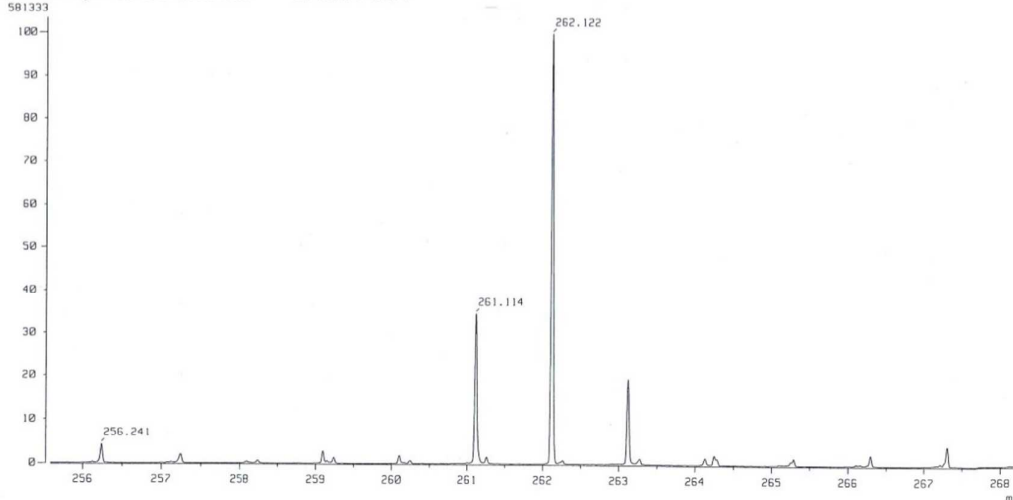

**Figure S33. HRMS spectrum of 3n**

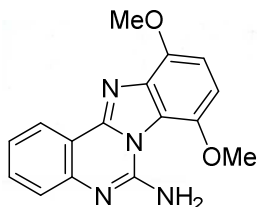

**3n**

[ Mass Spectrum ]  
Data : QD-376-HREI Date : 29-Mar-2017 09:30  
Sample: -  
Note: -  
Inlet : Direct Ion Mode : EI+  
Spectrum Type : Normal Ion [EF-Linear]  
RT : 1.00 min Scan#: 21  
BP : m/z 294.1120 Int. : 56.77  
Output m/z range : 289.2619 to 300.3205 Cut Level : 0.00 %

Data : QD-376-HREI Date : 29-Mar-2017 09:30  
Sample: -  
Note: -  
Inlet : Direct Ion Mode : EI+  
RT : 1.00 min Scan#: 21  
Elements : C 16/0, H 14/0, N 4/0, O 2/0  
Mass Tolerance : 1000ppm, 1mmu if m/z < 1, 3mmu if m/z > 3  
Unsaturation (U.S.) : -0.5 - 100.0

| Observed m/z | Int%  | Err[ppm / mmu] | U.S. | Composition       |
|--------------|-------|----------------|------|-------------------|
| 265.1085     | 18.7  | -1.7 / -0.4    | 11.5 | C 15 H 13 N 4 O   |
| 279.6880     | 44.3  |                |      |                   |
| 280.6420     | 12.5  |                |      |                   |
| 293.1041     | 45.9  | +0.8 / +0.2    | 12.5 | C 16 H 13 N 4 O 2 |
| 294.1120     | 100.0 | +1.1 / +0.3    | 12.0 | C 16 H 14 N 4 O 2 |
| 295.1132     | 21.8  |                |      |                   |

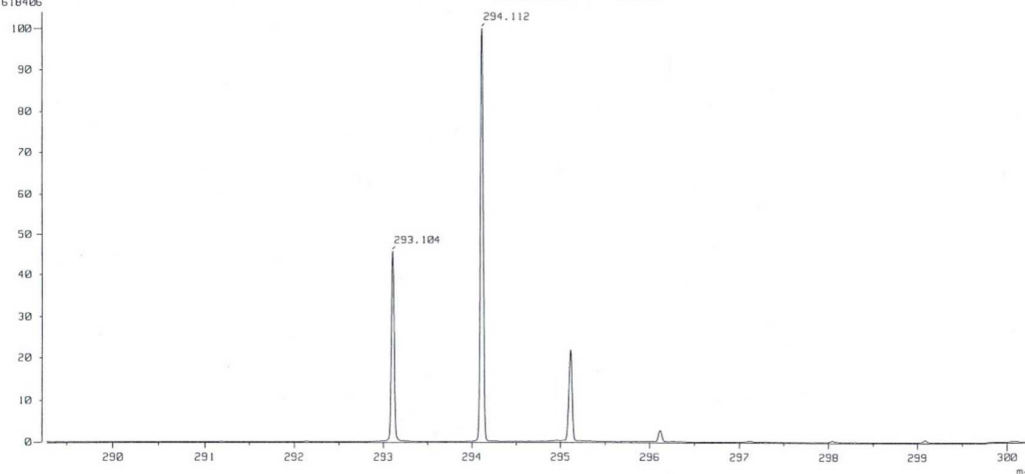



**Figure S34. HRMS spectrum of 3o**

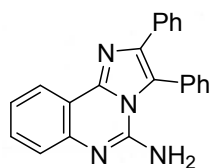

**3o**

[ Mass Spectrum ]  
Data : OD-325-C22H16N4 Date : 12-Dec-2016 16:07  
Sample: -  
Note: -  
Inlet: Direct Ion Mode: EI+  
Spectrum Type: Normal Ion (EF-Linear)  
RT: 0.73 min Scan#: (15,16)  
BP: m/z 335.1299 Int.: 44.47  
Output m/z range: 330.3027 to 341.4303 Cut Level: 0.00 %  
959707

[ Elemental Composition ]  
Data : QD-325-C22H16N4 Date : 12-Dec-2016 16:07  
Sample: -  
Note: -  
Inlet: Direct Ion Mode: EI+  
RT: 0.73 min Scan#: (15,16)  
Elements: C 22/0, H 16/0, N 4/0  
Mass Tolerance: 1000ppm, 1mmu if m/z < 1, 3mmu if m/z > 3  
Unsaturation (U.S.): -0.5 - 100.0

| Observed m/z | Int%  | Err[ppm / mmu] | U.S. | Composition   |
|--------------|-------|----------------|------|---------------|
| 335.1299     | 100.0 | +0.7 / +0.2    | 17.5 | C 22 H 15 N 4 |
| 336.1373     | 81.4  | -0.6 / -0.2    | 17.0 | C 22 H 16 N 4 |
| 337.1398     | 17.6  |                |      |               |

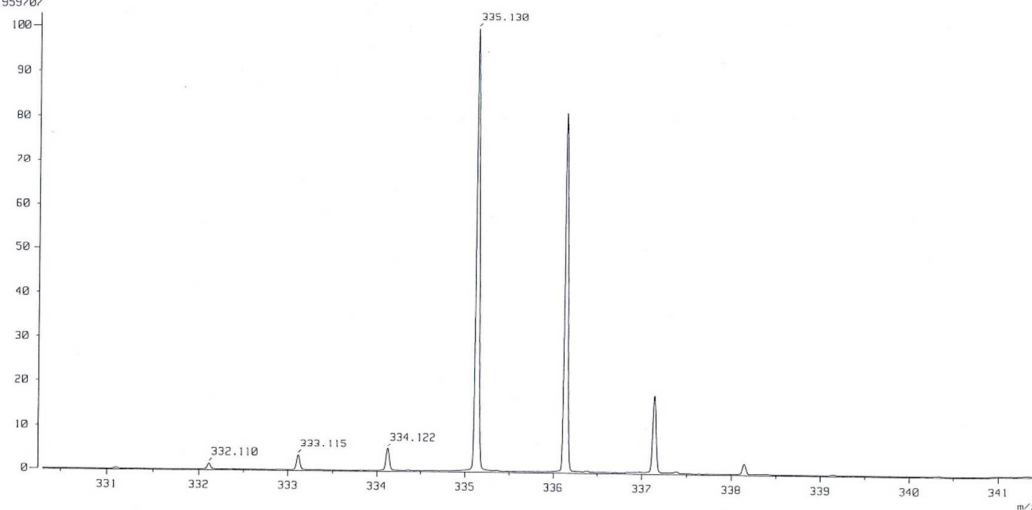

**Figure S35. HRMS spectrum of 5a**

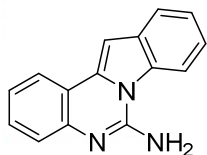

**5a**

[ Mass Spectrum ]  
Data : HK-211-C15H11N3 Date : 07-Sep-2016 13:50  
Sample: -  
Note: -  
Inlet: Direct Ion Mode: EI+  
Spectrum Type: Normal Ion (EF-Linear)  
RT: 1.33 min Scan#: (27,28)  
BP: m/z 233.0951 Int.: 9.30  
Output m/z range: 227.6588 to 238.9644 Cut Level: 0.00 %  
196070

[ Elemental Composition ]  
Data : HK-211-C15H11N3 Date : 07-Sep-2016 13:50  
Sample: -  
Note: -  
Inlet: Direct Ion Mode: EI+  
RT: 1.33 min Scan#: (27,28)  
Elements: C 15/0, H 11/0, N 3/0  
Mass Tolerance: 1000ppm, 1mmu if m/z < 1, 3mmu if m/z > 3  
Unsaturation (U.S.): -0.5 - 100.0

| Observed m/z | Int%  | Err[ppm / mmu] | U.S. | Composition   |
|--------------|-------|----------------|------|---------------|
| 205.0770     | 10.3  | +2.1 / +0.4    | 11.5 | C 14 H 9 N 2  |
| 233.0951     | 100.0 | -0.8 / -0.2    | 12.0 | C 15 H 11 N 3 |
| 234.0966     | 18.1  |                |      |               |

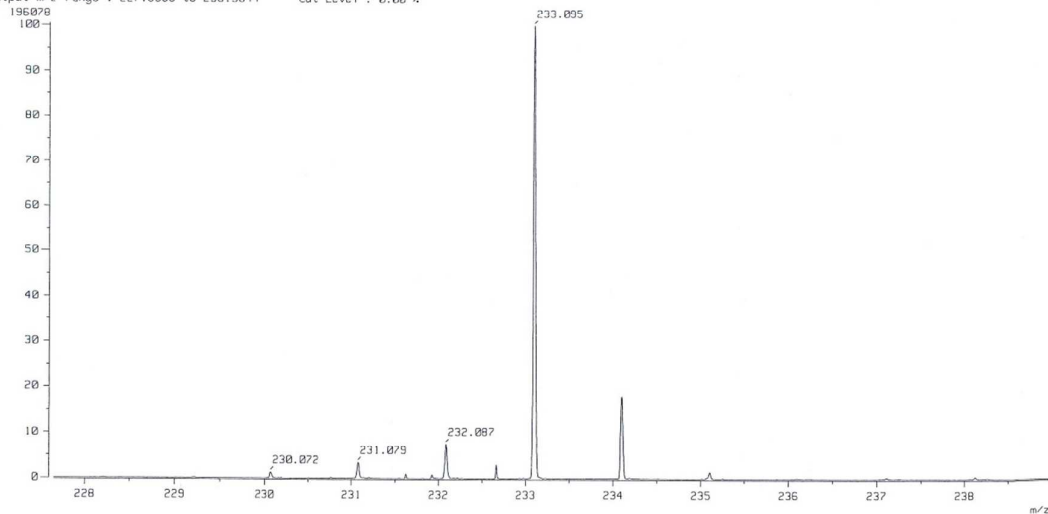



**Figure S36. HRMS spectrum of 5b**

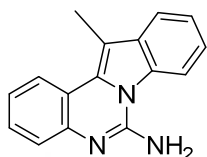

**5b**

[ Mass Spectrum ]  
Data : HK-210-C16H13N3 Date : 07-Mar-2017 15:35  
Sample: -  
Note: -  
Inlet: Direct Ion Mode: EI+  
Spectrum Type: Normal Ion (EF-Linear)  
RT: 1.05 min Scan#: 22  
BP: m/z 247.1108 Int.: 73.28  
Output m/z range: 241.4814 to 253.5513 Cut Level: 0.00 %

[ Elemental Composition ]  
Data : HK-210-C16H13N3 Date : 07-Mar-2017 15:35  
Sample: -  
Note: -  
Inlet: Direct Ion Mode: EI+  
RT: 1.05 min Scan#: 22  
Elements: C 16/0, H 13/0, N 3/0  
Mass Tolerance: 1000ppm, 1mmu if m/z < 1, 3mmu if m/z > 3  
Unsaturation (U.S.): -0.5 - 100.0

| Observed m/z | Int%  | Err[ppm / mmu] | U.S. | Composition   |
|--------------|-------|----------------|------|---------------|
| 246.1033     | 50.4  | +0.9 / +0.2    | 12.5 | C 16 H 12 N 3 |
| 247.1108     | 100.0 | -0.5 / -0.1    | 12.0 | C 16 H 13 N 3 |
| 248.1142     | 18.1  |                |      |               |

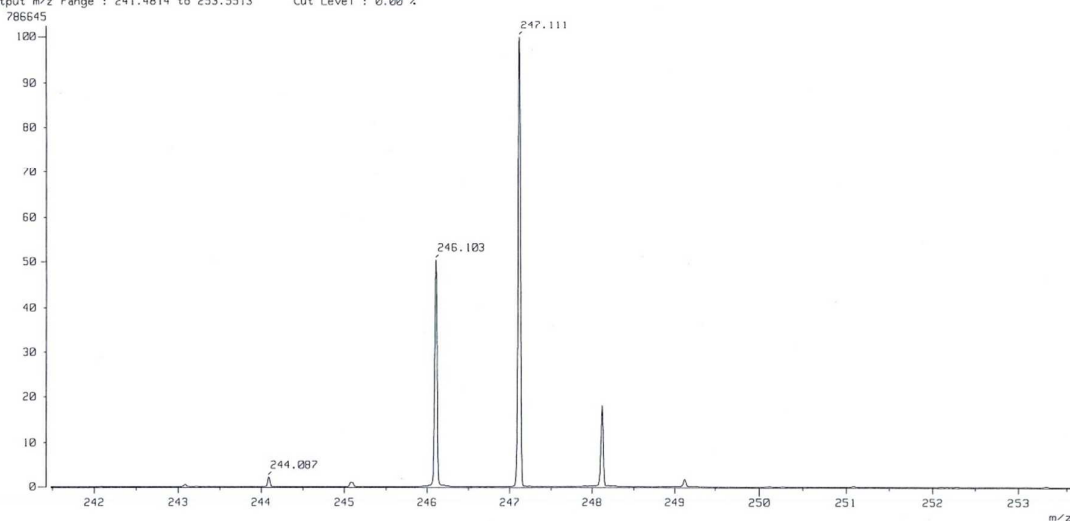

**Figure S37. HRMS spectrum of 5c**

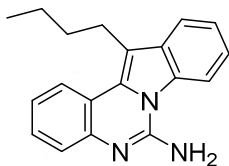

**5c**

[ Mass Spectrum ]  
Data : HK-217-HREI Date : 28-Feb-2017 09:38  
Sample: -  
Note: -  
Inlet: Direct Ion Mode: EI+  
Spectrum Type: Normal Ion (EF-Linear)  
RT: 0.75 min Scan#: 16  
BP: m/z 289.1580 Int.: 98.67  
Output m/z range: 284.1039 to 294.3412 Cut Level: 0.00 %

[ Elemental Composition ]  
Data : HK-217-HREI Date : 28-Feb-2017 09:38  
Sample: -  
Note: -  
Inlet: Direct Ion Mode: EI+  
RT: 0.75 min Scan#: 16  
Elements: C 19/0, H 19/0, N 3/0  
Mass Tolerance: 1000ppm, 1mmu if m/z < 1, 3mmu if m/z > 3  
Unsaturation (U.S.): -0.5 - 100.0

| Observed m/z | Int%  | Err[ppm / mmu] | U.S. | Composition   |
|--------------|-------|----------------|------|---------------|
| 289.1580     | 100.0 | +0.2 / +0.1    | 12.0 | C 19 H 19 N 3 |
| 290.1593     | 33.6  |                |      |               |

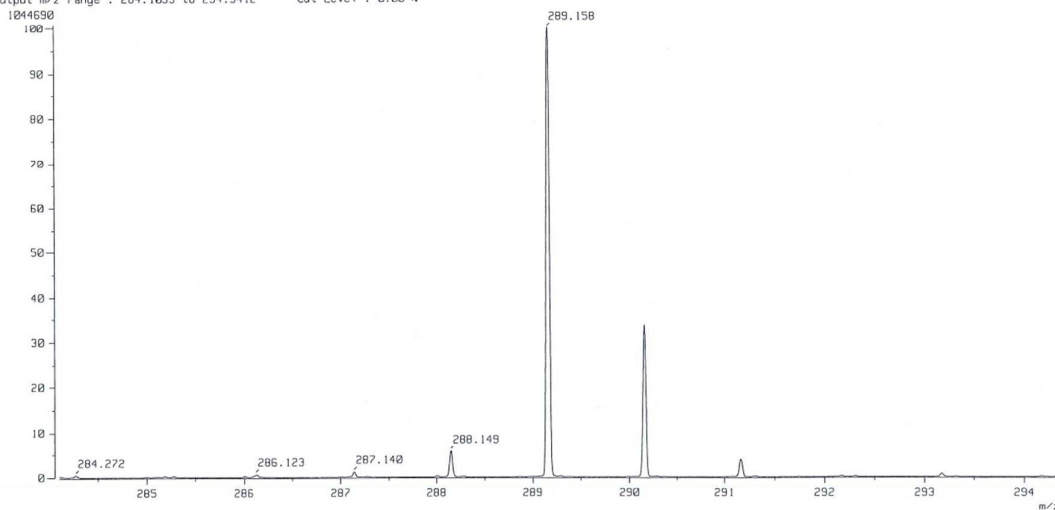

**Figure S38. HRMS spectrum of 5d**

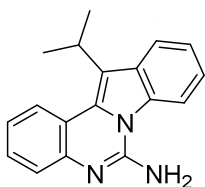

**5d**

[ Mass Spectrum ]  
 Data : HK-228-HREI Date : 28-Feb-2017 09:42  
 Sample: -  
 Note : -  
 Inlet : Direct Ion Mode : EI+  
 Spectrum Type : Normal Ion (EF-Linear)  
 RT : 1.00 min Scan# : 21  
 BP : m/z 260.1187 Int. : 92.50  
 Output m/z range : 269.2136 to 281.1424 Cut Level : 0.00 %

[ Elemental Composition ]  
 Data : HK-228-HREI Date : 28-Feb-2017 09:42  
 Sample: -  
 Note : -  
 Inlet : Direct Ion Mode : EI+  
 RT : 1.00 min Scan# : 21  
 Elements : C 18/0, H 17/0, N 3/0  
 Mass Tolerance : 1000ppm, 1mmu if m/z < 1, 3mmu if m/z > 3  
 Unsaturation (U.S.) : -0.5 - 100.0

| Observed m/z | Int%  | Err[ppm / mmu] | U.S. Composition   |
|--------------|-------|----------------|--------------------|
| 260.1187     | 100.0 | -0.3 / -0.1    | 12.5 C 17 H 14 N 3 |
| 261.1220     | 20.5  |                |                    |
| 275.1420     | 50.1  | -0.9 / -0.2    | 12.0 C 18 H 17 N 3 |
| 276.1458     | 10.5  |                |                    |

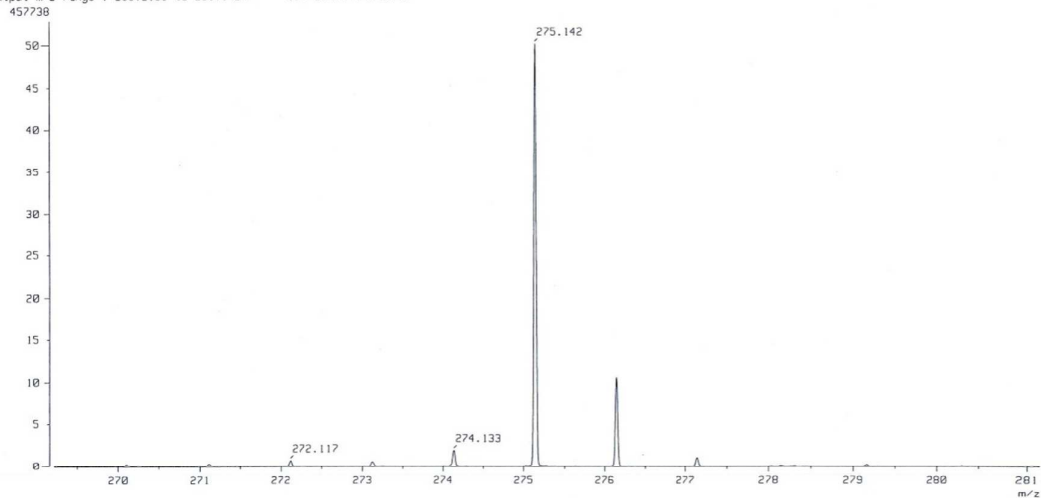

**Experimental Procedure for Mechanism Study.** A 10 mL microwave reaction tube was charged with **8** (0.086 g, 0.3 mmol) and **2** (0.025 g, 0.6 mmol) together with CuI (0.006 g, 0.03 mmol), K<sub>3</sub>PO<sub>4</sub> (0.127 g, 0.6 mmol), and DMF (3 mL). The reaction mixture was heated to 100 °C for 1 h by microwave irradiation at 100 W initial power. The mixture was then cooled to room temperature and filtered through a short silica gel column (ethyl acetate) to remove inorganic components. Removal of the solvent left a crude mixture, which was separated by TLC (dichloromethane/MeOH = 9/1) to give **9**.

*N*-(2-(1-Methyl-1*H*-benzo[*d*]imidazol-2-yl)phenyl)cyanamide (**9**). Pale yellow solid (58 mg, 78%). mp 125-127 °C. <sup>1</sup>H NMR (500 MHz, DMSO-*d*<sub>6</sub>) δ 4.57 (s, 3H), 6.02 (s, 1H), 7.61-7.64 (m, 1H), 7.76 (d, *J* = 8.2 Hz, 1H), 7.80-7.84 (m, 1H), 7.91-7.95 (m, 1H), 7.99-8.02 (m, 1H), 8.36 (d, *J* = 8.4 Hz, 1H), 8.71 (d, *J* = 8.5 Hz, 1H), 8.79 (d, *J* = 8.3 Hz, 1H). <sup>13</sup>C NMR (125 MHz, DMSO-*d*<sub>6</sub>) δ 34.8, 112.7, 113.3, 116.1, 122.6, 124.5, 125.8, 126.1, 128.3, 132.7, 133.2, 135.6, 141.4, 145.6, 146.7. HRMS (EI) calcd for C<sub>15</sub>H<sub>12</sub>N<sub>4</sub> (M<sup>+</sup>): 248.1062. Found 248.1059.

**Figure S39.** <sup>1</sup>H and <sup>13</sup>C NMR spectra of **9**

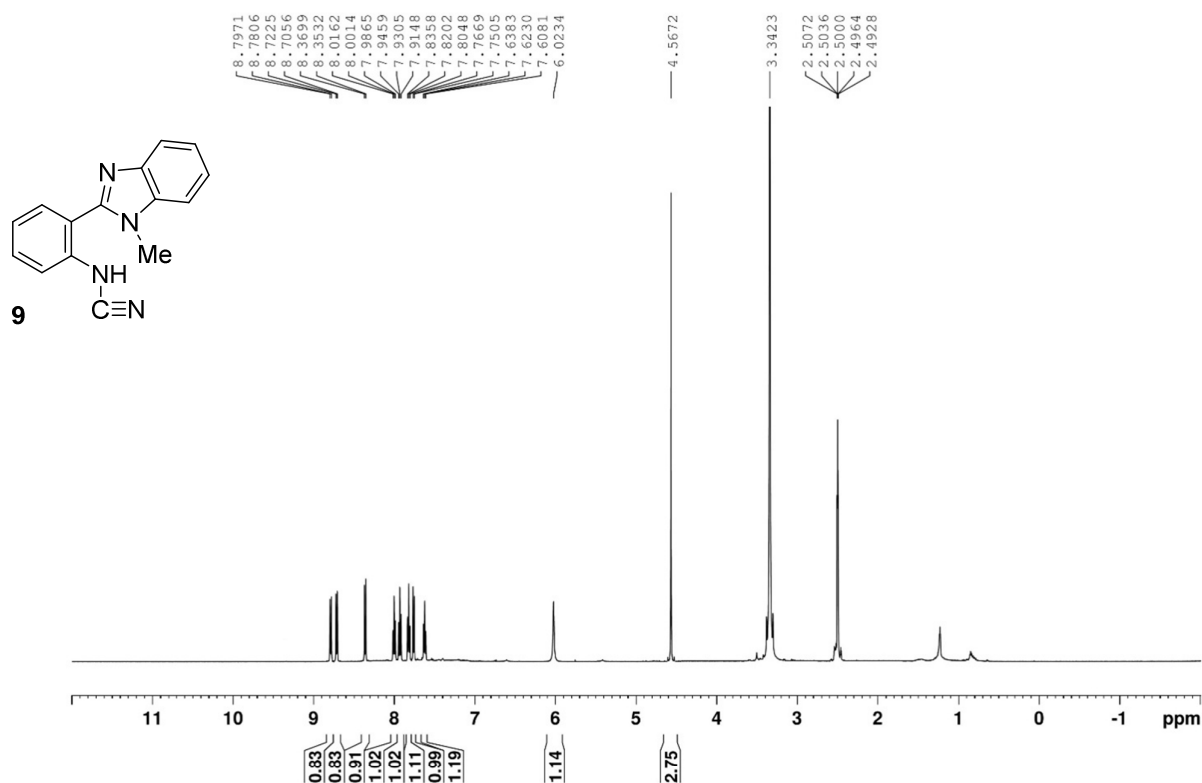

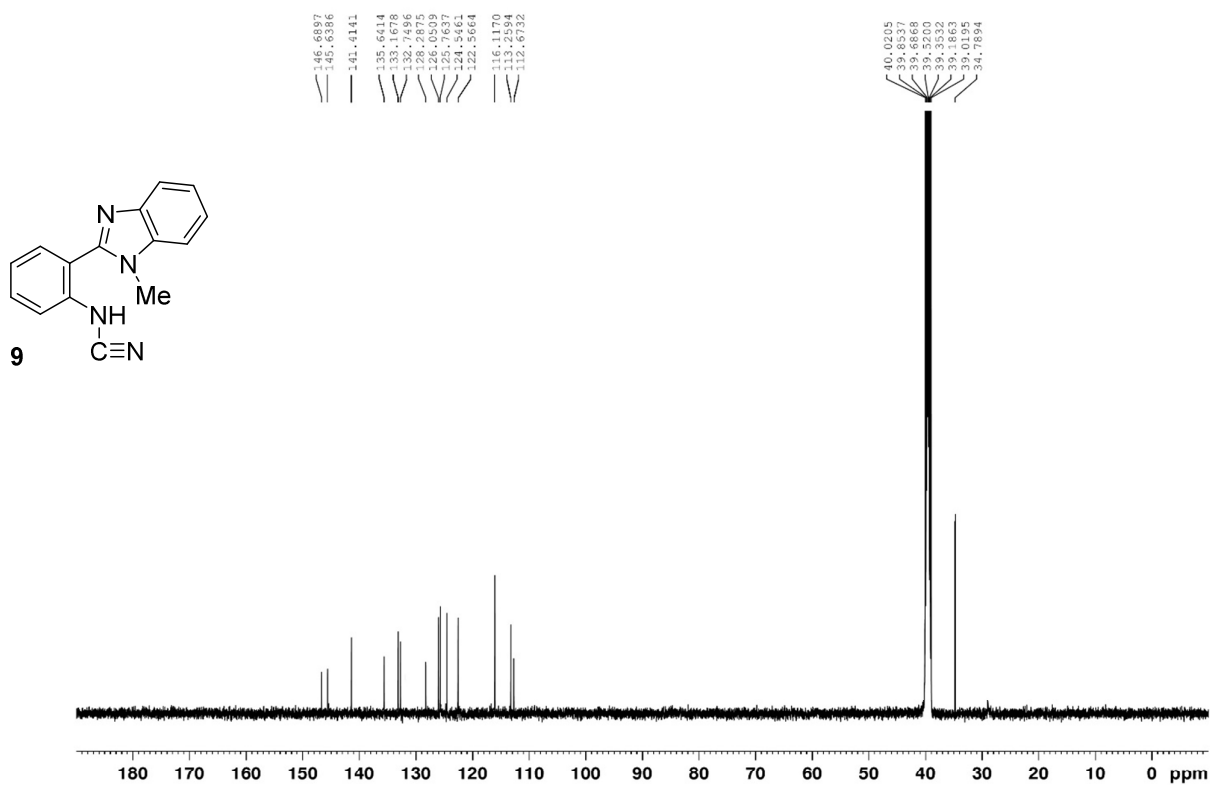

**Figure S40.** HRMS spectrum of **9**

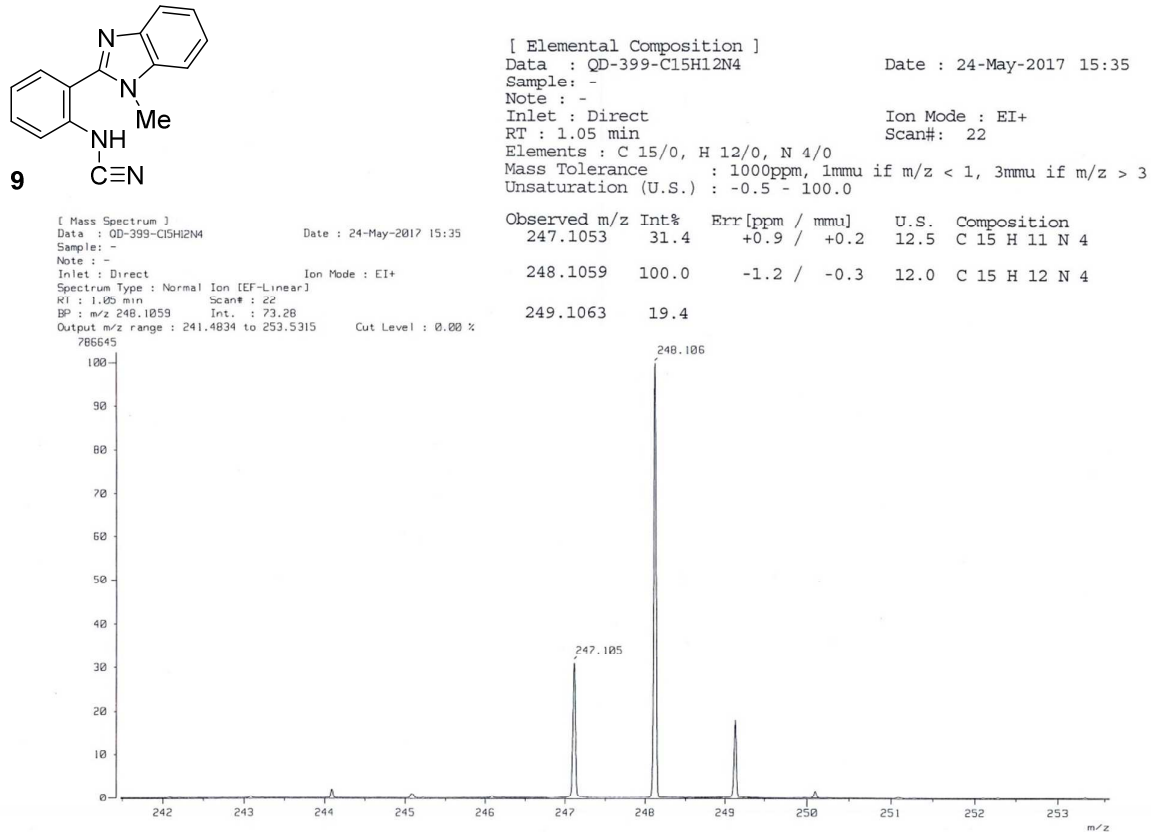

Supplement: Supplementary file 1 [file 8754004]
